1 **A rapid alkalization factor-like peptide EaF82 impairs tapetum degeneration during**  
2 **pollen development**

3

4 Chiu-Yueh Hung<sup>1</sup>, Farooqahmed S. Kittur<sup>1</sup>, Keely N. Wharton<sup>1,a</sup>, Jianjun Chen<sup>2</sup>, Makendra L.  
5 Umstead<sup>1,b</sup>, D'Shawna B. Burwell<sup>1</sup>, Martinique Thomas<sup>1,c</sup>, Qi Qi<sup>1</sup>, Jianhui Zhang<sup>1</sup>, Carla E.  
6 Oldham<sup>1</sup>, Kent O. Burkey<sup>3</sup> and Jiahua Xie<sup>1,\*</sup>

7

8 <sup>1</sup> Department of Pharmaceutical Sciences, Biomanufacturing Research Institute & Technology  
9 Enterprise, North Carolina Central University, Durham, 27707, USA

10 <sup>2</sup> Environmental Horticulture Department and Mid-Florida Research and Education Center,  
11 Apopka, University of Florida, Apopka, 32703, USA

12 <sup>3</sup> USDA-ARS Plant Science Research Unit and Department of Crop and Soil Sciences, North  
13 Carolina State University, Raleigh, 27695, USA

14 <sup>a</sup> Present address: Yale University, School of Medicine, New Haven, CT 06520, USA

15 <sup>b</sup> Present address: EMD Serono Inc., Rockland, MA 02370, USA

16 <sup>c</sup> Present address: Rho Inc., Durham, NC 27713, USA

17 \* Corresponding author: Jiahua Xie ([jxie@nccu.edu](mailto:jxie@nccu.edu)); 1-919-530-6705; Department of  
18 Pharmaceutical Sciences, North Carolina Central University, 1801 Fayetteville Street, Durham,  
19 27707, USA

20

21

22

23

24

25

26

27

28

29

30

31

32 **Abstract**

33 In plants, many small peptides have been discovered and are thought to function as growth  
34 regulators. However, the functions of most of them remain unknown. In this study, we  
35 systematically characterized EaF82, a novel cysteine-rich peptide isolated from shy-flowering  
36 ‘Golden Pothos’ plants. Our studies revealed that EaF82 is closely related to the rapid  
37 alkalization factors (RALFs) and displays alkalinizing activity. Its heterologous expression in  
38 Arabidopsis impaired tapetum degeneration and reduced pollen production and seed yields.  
39 RNA-Seq, RT-qPCR and biochemical analyses showed that overexpressing *EaF82* down-  
40 regulated a group of genes involved in pH changes, cell wall modifications, tapetum  
41 degeneration and pollen maturation as well as endogenous Arabidopsis clade IV *AtRALFs*, and  
42 decreased proteasome activity and ATP levels. Yeast two-hybrid screening and co-  
43 immunoprecipitation identified AKIN10, an energy sensing kinase, to be its interacting partner.  
44 These results suggest that EaF82 action may be mediated through AKIN10 leading to alterations  
45 of transcriptome and energy metabolism, thereby causing ATP deficiency and impairing pollen  
46 development. Our study reveals a new regulatory role for RALF peptide in tapetum  
47 degeneration.

48

49 **Key words:** ATP deficiency; cysteine-rich peptide; *Epipremnum aureum*; pollen production;  
50 kinase AKIN10; rapid alkalization factor; tapetum degeneration.

51

52

53

54

55

56

57

58

59

60

61

62

63

## 64 **Introduction**

65 Polypeptide hormones have long been recognized as growth and development regulators in  
66 animals and yeast; but little is known about such polypeptides in plants until the discovery of  
67 systemin in 1991<sup>1</sup>. Since then, numerous plant peptide hormone sequences were identified<sup>2</sup> and  
68 the quest for understanding their functions and action modes is growing. One such peptide  
69 family is rapid alkalization factors (RALFs), which are small cysteine-rich peptides (CRPs)  
70 and widely present in plant kingdom<sup>3</sup>. Many RALF sequences have been identified from  
71 genomic sequences<sup>4,5</sup>. A phylogenetic analysis of 795 RALFs from 51 species showed that they  
72 fall into four distinct clades<sup>5</sup>. However, only a handful of RALFs belonging to clades I, II and III  
73 have been functionally characterized to be involved in cell expansion, root and root hair  
74 development, pollen tube elongation/rupture and immunity, while the majority of them have not  
75 been studied<sup>6</sup>. The clade IV is the least investigated and distinct from other clades with greater  
76 evolutionary divergence<sup>5,6</sup>.

77 Studies related to the function and mechanism of RALFs are attracting greater attention due  
78 to their importance in plant growth and development, and defense against biotic and abiotic  
79 stresses<sup>7,8</sup>. Recent studies on Arabidopsis AtRALF1/23/4/19 demonstrated that their actions are  
80 perceived through interactions with CrRLK1L (*Catharanthus roseus* Receptor Like Kinase 1  
81 Like) receptors<sup>6</sup>. Binding of AtRALFs to CrRLK1L receptors triggers downstream signal  
82 transduction including down-regulation of H<sup>+</sup>-ATPase resulting in extracellular pH increase. The  
83 increased extracellular pH was thought to strengthen the cell wall to prevent pathogen invasion  
84 and make alkaline apoplasts an unfavorable environment for pathogens<sup>9</sup>. The pH increase also  
85 counteracts the acidification-induced loosening of cell wall leading to inhibition of root growth  
86 and pollen tube elongation<sup>10</sup>. As for clade IV RALFs, many members are thought to be involved  
87 in pollen development based on their transcriptional patterns. Studies on male sterile Chinese  
88 cabbage lines found that three out of 14 identified differentially expressed *RALFs* belong to clade  
89 IV<sup>11</sup>. Studies on four pollenless Arabidopsis tapetum mutants also revealed that five out of seven  
90 differentially expressed *RALFs* are members of clade IV<sup>12</sup>. In Arabidopsis, six out of eight  
91 pollen-abundant *AtRALFs* (4/8/9/15/19/25/26/30) were found to belong to clade IV<sup>13</sup>. However,  
92 to date, their precise roles and underlying mechanism of action in pollen development are still  
93 unknown.

94 We previously isolated a novel gene *EaF82* from shy-flowering ‘Golden Pothos’ plant  
95 (*Epipremnum aureum*)<sup>14,15</sup> which encodes a small CRP<sup>16</sup>. Its expression was positively regulated  
96 by auxin<sup>16</sup>, but its function was unknown because of the shy-flowering nature of ‘Golden Pothos’  
97 plants, which makes its functional study challenging. In the present study, we show that *EaF82* is  
98 closely related to clade IV RALFs and the synthetic *EaF82* peptide can induce alkalinization of  
99 tobacco suspension cell culture medium as typical RALFs. Overexpressing *EaF82* in  
100 Arabidopsis and tobacco plants was found to dramatically reduce seed-setting. RNAseq analysis  
101 was used to identify those affected genes in Arabidopsis transgenic lines overexpressing *EaF82*.  
102 Furthermore, the interacting partners of *EaF82* were screened by the yeast two-hybrid (Y2H)  
103 assay and verified, and the downstream effects of decreased ATP levels caused by accumulated  
104 *EaF82* were investigated. Our studies reveal the inhibitory role of *EaF82* in tapetum  
105 degeneration. Its potential action mechanism through binding to AKIN10, a catalytic  $\alpha$ -subunit  
106 of energy sensor - sucrose non-fermenting related kinase 1 (SnRK1), is discussed.

107

## 108 RESULTS

109 **EaF82 is a clade IV RALF-like peptide.** Our previous search for *EaF82* homologs using  
110 protein BLAST only found an antimicrobial peptide MiAMP1 from *Macadamia integrifolia* as  
111 the closest match with E-value of 0.094 and 48% similarity<sup>16</sup>. In the current study, we further  
112 analyzed its sequence features and used a recent comprehensive peptide classification system  
113 based on peptide structural features and biological functions<sup>8</sup> to find its closely related peptide  
114 homologs. In the deduced 120-amino acid *EaF82* peptide sequence from the cloned cDNA, a 30-  
115 amino acid signal peptide (Fig. 1a) was predicted by SignalP 5.0<sup>17</sup>. *EaF82* contains four  
116 cysteines at positions 42, 54, 81 and 95, which potentially form two intramolecular disulfide  
117 bridges (Fig. 1a). Its primary structural features were found to be most similar to a group of  
118 CRPs classified as “nonfunctional precursor” by Tavormina et al.<sup>8</sup>. The numbers of cysteines and  
119 the amino acid patterns around disulfide bonds are known to be conserved for proteins having  
120 similar folding and function, and can be used as the basis for protein classification<sup>18</sup>. Thus, these  
121 criteria were used for further classification and revealed that the features of *EaF82* were closest  
122 to RALFs among the listed CRPs, having two predicted intramolecular disulfide bridges and an  
123 N-terminal signal peptide<sup>19</sup>.

124 The hallmark of RALFs is their ability to rapidly alkalinize tobacco cell culture media upon  
125 addition of exogenous peptide<sup>7</sup>. To investigate whether EaF82 also possesses a RALF-like  
126 alkalinizing activity, EaF82 peptide without signal peptide was synthesized (designated as  
127 EaF82-S) and its activity was measured, including kinetic parameters  $K_m$  and  $V_{max}$ . EaF82-S  
128 exhibited alkalinizing activity with a  $V_{max}$  of  $\Delta pH \sim 0.4$ , which was about half of reported  
129 values<sup>7</sup>, and  $K_m$  of 1 nM (Fig. 1b) close to reported values for RALFs<sup>7,10</sup>. The pH increase  
130 peaked at 30 min and returned to baseline after 60 min (Fig. 1c). In contrast, the EaF82  
131 alkalinizing activity was abolished when the peptide was reduced and alkylated to break  
132 disulfide bonds (a negative control) (Supplementary Fig. 1a). The results indicate that EaF82 has  
133 a RALF-like alkalinizing activity.

134 To examine the evolutionary relationship of EaF82 with RALFs, phylogenetic analysis was  
135 performed using the method and sequence information described by Campbell & Turner<sup>5</sup>. We  
136 found that EaF82 belonged to clade IV-C (Fig. 1d). Since the model plant *Arabidopsis* was to be  
137 used to heterologously express *EaF82* for functional studies, we further used 13 out of 14  
138 *Arabidopsis* clade IV-C RALFs from previous publication<sup>5</sup> to align with EaF82 by MUSCLE<sup>20</sup>  
139 and analyze their evolutionary relationships using MEGA X<sup>21</sup>. The reported AtRALF17  
140 (AT2G32890)<sup>5</sup> was excluded as it lacks common features of RALF family members and is very  
141 likely not a RALF peptide<sup>22</sup>. Phylogenetic analysis revealed that EaF82 was closely related to  
142 AtRALF8/9/15 (Fig. 1e), which are known to be abundantly expressed in pollen<sup>13</sup>.

143  
144 **EaF82 is expressed and accumulated in anthers but not in pollen.** To investigate its  
145 physiological function, a reporter gene *sGFP(S65T)* in-frame with *EaF82* driven by *EaF82*  
146 promoter (*EaF82p::EaF82-sGFP* designated as TA) or a constitutive *CaMV 35S* promoter  
147 (*35Sp::EaF82-sGFP* designated as TB) (Supplementary Fig. 2) was transformed into  
148 *Arabidopsis*. The former was used to determine the *EaF82* expression sites while both of them  
149 were used to investigate the effects of EaF82 peptide on *Arabidopsis* growth and development.  
150 When the *EaF82* transcriptional and translational expression levels in TA transgenic seedlings  
151 were analyzed by RT-PCR and immunoblotting, expected sizes of PCR and protein products  
152 were detected (Supplementary Fig. 3a). These validated TA transgenic seedlings showed strong  
153 GFP signals in roots, especially at the basal and apical meristems of primary and lateral roots  
154 (Supplementary Fig. 3b, c), where auxin is known to be accumulated<sup>23</sup>. The results are consistent

155 with our previous finding in which GUS was found to accumulate at the same sites when driven  
156 by *EaF82* promoter<sup>16</sup>. GFP signals were also observed in anthers and filaments of mature  
157 flowers (opened), but only occasionally in released pollen grains (Fig. 2a, b). Similarly, in our  
158 previously created *EaF82p::GUS* plants<sup>16</sup>, less GUS activity was observed in mature flowers  
159 than in early stages of closed flower buds (Fig. 2c), where high auxin accumulation has been  
160 reported<sup>24</sup>.

161 *EaF82* is closely homologous to AtRALF8/9/15 (Fig. 1e), which are reported to be abundant  
162 in pollen<sup>13</sup>. However, the expression of both reporter genes driven by *EaF82* promoter was rarely  
163 detected in pollen grains (Fig. 2b, c). Thus, its protein level in pollen was further examined in  
164 detail. Seedlings with confirmed *EaF82* accumulation from four independent TA lines  
165 (Supplementary Fig. 4a) were transferred to soil and grew into mature plants to collect pollen  
166 grains. These TA seedlings grew normally on MS medium (Supplementary Fig. 4b) and became  
167 mature plants on soil, indicating that *EaF82* did not inhibit vegetative growth as reported for  
168 AtRALF1/8/23<sup>6</sup>. Collected pollen grains had little detectable *EaF82* and GFP proteins as  
169 revealed by immunoblotting (Fig. 2d). Indeed, under the confocal microscope only a few pollen  
170 grains displayed GFP signals (Fig. 2e). These results indicate that *EaF82* was not abundant in  
171 pollen. Thus, the observed GFP signals in anthers (Fig. 2a) did not originate from pollen but very  
172 likely from the surrounding tissues.

173 Interestingly, the above TA lines showed many unpollinated pistils and short siliques on the  
174 primary inflorescence stalks (Fig. 2f). This observation raised the question of whether *EaF82*  
175 plays a role in seed-setting since a group of RALFs could affect the rate of seed-setting through  
176 regulating pollen tube elongation<sup>10</sup>. We examined pollen viability and pollen tube elongation.  
177 There were no differences in the general features of pollen grains compared to those of wild-type  
178 (WT) (Fig. 2g). Moreover, there were no obvious differences in pollen germination ability and *in*  
179 *vitro* pollen tube elongation compared to WT (Fig. 2h). Therefore, the effects of *EaF82* on pollen  
180 viability are likely minimum, which is consistent with the observed result with no substantial  
181 *EaF82* accumulation in produced pollen grains (Fig. 2d). These results led us to speculate that  
182 the unpollinated pistils and short siliques could be the results of high *EaF82* accumulation in the  
183 surrounding tissues of pollen sacs leading to either no pollen or less pollen available at certain  
184 stages. Since the TA lines were driven by auxin responsible *EaF82* promoter<sup>16</sup>, it is possible that

185 the accumulation of EaF82 along the inflorescence stalk was uneven due to the uneven auxin  
186 distribution affected by the environmental conditions.

187 The above speculation that high EaF82 accumulation in the surrounding tissues of pollen  
188 sacs might affect pollen development was underpinned by the observations from TB lines with  
189 the *EaF82* driven by a strong constitutive *CaMV 35S* promoter. First, although the same floral  
190 dipping procedure for creating TA lines was used, our transformation efforts with the TB  
191 cassette resulted in only two independent lines (TB-1 and TB-2), despite several attempts. The  
192 difficulty of TB transformation seemingly implies that the presence of high EaF82 might cause  
193 the developmental problem in transformed pollen and affect the production of transformed seeds.  
194 When two TB lines were grown on MS medium, their seedlings were normal as the WT  
195 (Supplementary Fig. 5a), but EaF82 and GFP were detected only in TB-2 line by  
196 immunoblotting (Supplementary Fig. 5b). TB-2 plants bore few pollen grains and produced only  
197 1-2 small siliques per plant even though they produced many flowers (Fig. 3a, b). TB-2 line  
198 exhibited more severe seed abortions than TA lines (Fig. 2f). In order to obtain ~100 siliques, 72  
199 independent plants were planted per subline of TB-2a and TB-2b. The average numbers of seeds  
200 per silique in TB-2 plants were reduced to only 4 compared to 49 in the case of WT (Fig. 3c).

201 Since the major difference between TA and TB lines was the promoters, we further tested  
202 promoter activities using multiple independent tobacco (*N. tabacum*) transgenic lines carrying  
203 genetic cassettes *35Sp::GUS* or *EaF82p::GUS* (Supplementary Fig. 2) to compare their *GUS*  
204 transcript levels. RT-qPCR results showed ~3.5-fold higher *GUS* expressions in transgenic  
205 *35Sp::GUS* plants than those of transgenic *EaF82p::GUS* (Supplementary Fig. 6), indicating that  
206 the activity of *CaMV 35S* promoter is stronger than that of *EaF82* promoter. Thus, the severe  
207 seed abortion phenotype in TB-2 probably was the result of higher expression of EaF82-sGFP  
208 than that of TA lines, supporting that the high expression levels of EaF82 may be responsible for  
209 the reduction of seed yield.

210

211 **Overexpressing EaF82 impaired tapetum degeneration during pollen development in**  
212 **Arabidopsis.** The observed pollenless phenotype in TB-2 (Fig. 3a) implies that the pollen  
213 development was compromised. We wondered whether the reduced seed-setting was the results  
214 of defective pollen development. Considering the observed accumulation of EaF82 in anthers  
215 and closed flower buds (Fig. 2a-c) where pollen is under development, we first investigated at

216 which stage pollen development was impaired by histological analysis. In Arabidopsis, flower  
217 buds are clustered and the flower development can be divided into 12 developmental stages  
218 using a series of landmark events as described by Smyth et al.<sup>25</sup>. The anther development can be  
219 further divided into 14 stages based on the visualization of distinctive cellular events under  
220 microscope<sup>26</sup>. According to the key events of each stage, the pollenless TB-2 line was examined  
221 and found that stages of microspore mother cells undergoing meiosis and generating tetrads of  
222 haploid microspores, and microspores releasing from the tetrads (up to stage S8) were similar to  
223 those in WT (Fig. 3d). The abnormality was noticed at stages S11 and S12. At S11, the  
224 disappearance of tapetum occurred in WT but not in TB-2, and hence most of TB-2 pollen grains  
225 were aborted at S12 (Fig. 3d). These observations were further confirmed in another TB-2 flower  
226 cluster (Supplementary Fig. 7), indicating that overexpressing EaF82 impairs tapetum  
227 degeneration leading to defective pollen development.

228

### 229 **Overexpressing EaF82 also affected pollen development and seed-setting in tobacco plants.**

230 To verify that the observed effects of EaF82 on pollen development and seed-setting were not  
231 limited to Arabidopsis, a genetic cassette *35Sp::EaF82* (designated as TC) (Supplementary Fig.  
232 2) was expressed in *N. benthamiana* plants. Because tobacco leaf disc transformation method is  
233 efficient, this approach was used to generate 15 independent transgenic lines (T1-T15) with  
234 seven of them exhibiting a 3 to 1 segregation. Out of these seven lines, four (T2, T3, T8 and  
235 T11) had detectable EaF82 in leaves (Fig. 4a) and flowers (Fig. 4b) as revealed by  
236 immunoblotting. Mature anthers of these four transgenic lines were often shriveled in appearance  
237 with no or less pollen grains while those of the vector control lines were dehisced with many  
238 released pollen grains (Fig. 4c). Transgenic flowers were either not fertilized to develop seed  
239 pods or partially fertilized to develop small seed pods compared to those normal pods produced  
240 from the control lines (Fig. 4d). The seed numbers per pod of lines T2, T3, T8 and T11 were  
241 reduced by 42%, 22%, 50% and 58%, respectively, compared to the control lines (Fig. 4e). The  
242 results from these transgenic lines further support that EaF82 inhibits pollen development and  
243 seed setting in tobacco plants.

244

### 245 **Overexpressing EaF82 reduced the expression of genes involved in tapetum degeneration.**

246 To elucidate the observed impaired tapetum degeneration during pollen development, RNAseq



247 analysis was performed to gain molecular insights of EaF82 associated transcriptional  
248 alterations. To ensure the pollen abortion is associated with overexpressed EaF82 but not sGFP,  
249 Arabidopsis transgenic lines with the TC (*35Sp::EaF82*) genetic cassette (Supplementary Fig. 2)  
250 were created. Similar to TB, transformation with TC genetic cassette was challenge and  
251 produced only two lines (TC-1 and TC-2) with detectable EaF82 levels (Fig. 5a, b). They grew  
252 normally during the vegetative stage compared to the WT but exhibited seed abortion (Fig. 5c, d)  
253 like TA and TB lines. Their unopened flowers had detectable EaF82 (Fig. 5e) and later could  
254 develop some viable pollen grains with normal pollen tube growth (Fig. 5f, g). However, many  
255 TC siliques were short in length compared to most WT siliques (Fig. 5h). A large-scale  
256 measurement using siliques from 10 primary stems per line showed that approximately 20.5% of  
257 TC-1 and 27.8% of TC-2 flowers did not develop siliques longer than 0.3 cm (Fig. 5h), which  
258 contained no seed at all (Supplementary Fig. 8). Only 16.6% of TC-1 and 18.8% of TC-2 siliques  
259 were longer than 1.0 cm while that of WT was 88.5% (Fig. 5h).

260 To gain molecular insights into transcriptional changes during pollen development, the gene  
261 expression profiles of the unopened flower bud clusters covering all anther developmental stages  
262 from TC-1 and TC-2 lines were analyzed by RNAseq along with a vector control line. Two TC  
263 lines were used to perform double verification of any observed differentially expressed genes  
264 (DEGs). The numbers of reads were between 18.3 to 20.0 million (Supplementary Table 1), and  
265 listed genes reported as FPKM (Fragments Per Kilobase Million) were 28,296 (Supplementary  
266 Data Set 1), covering ~90% of total nuclear, mitochondria and chloroplast genes (Supplementary  
267 Fig. 9a). The numbers of common DEGs in TC-1 and TC-2 either increased or decreased 2-fold  
268 with adjusted *p*-value for false discovery rate (FDR) < 0.05 compared to the vector control were  
269 158 and 1197, respectively (Fig. 5i; Supplementary Table 2, 3). Hierarchical cluster analysis of  
270 74 down-regulated DEGs with  $\log_2FC \leq -1.5$  (reduced  $\geq 2.8$ -fold) plotted in heatmaps with R  
271 function showed a strong correlation between TC-1 and TC-2 lines (Supplementary Fig. 9b). The  
272 above results demonstrated that overexpressing *EaF82* induced ~5% nuclear gene expression  
273 changes  $\geq 2$ -fold in the early development of flowers.

274

275 **GO analysis and RT-qPCR validation revealed a large group of down-regulated DEGs**  
276 **involved in cell wall modifications and pH changes.** To determine the affected pathways and  
277 related genes in overexpressing *EaF82* lines, identified 158 up- and 1197 down-regulated DEGs

278 were subjected to Gene Ontology (GO) analysis using PANTHER v16<sup>27</sup>, and some selected  
279 DEGs were subjected to RT-qPCR validation. In the up-regulated DEGs, only regulation of  
280 developmental process (GO:0050793) in biological process and sequence-specific DNA binding  
281 (GO:0043565) in molecular function were significantly enriched with a similar group of genes  
282 (Supplementary Data Set 2), including flowering-related genes *AGL19*, *TFL1*, *AGL20* (*SOC1*),  
283 *AGL24*, *AGL42*, *FD* and *SAP*<sup>28,29</sup>. All four AGAMOUS-LIKE DEGs *AGL19*, *AGL20*, *AGL24*  
284 and *AGL42* were selected for validation by RT-qPCR. The results show similar fold increases to  
285 those observed by RNAseq analysis (Table 1).

286 In the down-regulated DEGs, notably enriched GO terms related to the observed  
287 characteristics of transgenic plants were those involved in the regulation of pH, and cell wall  
288 modification (Fig. 5j). The overrepresented DEGs include genes encoding 29 pectin  
289 methylesterases (PMEs)/pectin methylesterase inhibitors (PMEIs), along with six H<sup>+</sup>-ATPases  
290 and 16 cation/H<sup>+</sup> antiporters involved in regulating pH changes (Supplementary Data Set 3;  
291 Supplementary Table 4). Among them, twenty-eight were selected and validated by RT-qPCR.  
292 Their downregulations from RNAseq analysis were well confirmed by RT-qPCR results with  
293 similar fold decreases (Table 1, 2). These DEGs are known to play important roles in modulating  
294 the cell walls as an adaptation to stresses during plant development<sup>30</sup>. PME activity is regulated  
295 by pH changes through coordinating with H<sup>+</sup>-ATPases and cation/H<sup>+</sup> antiporter<sup>31</sup>. Both PMEs  
296 and PMEIs are highly expressed in flower buds and anthers<sup>32,33</sup>. Among the down-regulated  
297 pollen specific *PMEs* (Supplementary Table 4), *PPME1* and *PME48* are regulated by RGA, a  
298 GA repressor DELLA<sup>34</sup>; while *PME5/VGD1*, *PME4/VGDH1* and *VGDH2* are regulated by  
299 MYB80, a transcription factor regulating both tapetum and pollen development<sup>35</sup>. These down-  
300 regulated DEGs together with reported roles of RGA and MYB80 at the late stage of tapetum  
301 degeneration and pollen development<sup>34,35</sup> suggest that cell wall modification was altered during  
302 the pollen development, supporting observed impaired tapetum degeneration and pollen abortion  
303 (Fig. 3d).

304 Moreover, seven DEGs (*AGP5/6/11/14/23/24/40*) encoding highly glycosylated  
305 arabinogalactan proteins (AGPs), which play key roles in pollen wall formation<sup>36</sup>, were also in  
306 down-regulated DEGs (Supplementary Table 4). In Arabidopsis, pollen grains from *AGP6* and  
307 *AGP11* double mutants have been reported to exhibit pollen wall collapse<sup>37</sup>, and *AGP6*, *AGP11*,  
308 *AGP23* and *AGP40* are known to be involved in nexine formation<sup>36</sup>. These down-regulated

309 *AGPs* present a strong correlation with the observed aborted pollen at stages S11 and S12 (Fig.  
310 3d; Supplementary Fig. 7).

311  
312 **DEGs involved in tapetum degeneration.** Pollen is developed inside the anther locules<sup>38</sup>. The  
313 innermost layer of anther locules is the tapetum, which is in direct contact with the germ cells  
314 and is the main tissue providing nutrition and enzymes for pollen development and pollen wall  
315 formation<sup>39,40</sup>. Mounting evidence suggests that the pollen developmental process is tightly  
316 linked to the development of tapetum<sup>40,41</sup> with the latter divided into three developmental stages:  
317 tapetum differentiation, tapetum formation, and tapetum degeneration through program cell  
318 death (PCD)<sup>39</sup>. Tapetal cells appear at the stage S5 and their degradation is initiated at the stage  
319 S10<sup>26</sup>. Our histological results of pollen development (Fig. 3d; Supplementary Fig. 7) showed  
320 that overexpressing *EaF82* interrupted tapetum degeneration at S11, but not tapetum  
321 differentiation and formation. This was supported by RNAseq data, which showed that many  
322 known genes involved in early stages of tapetum differentiation and tapetum formation<sup>40</sup> were  
323 detected but not differentially expressed (Supplementary Table 5), whereas expression of *CEP1*  
324 involved in late stage of tapetum degeneration was found to be reduced ~16-fold (Supplementary  
325 Tables 4, 5). *CEP1* encodes a papain-like cysteine protease and participates in tapetal cell wall  
326 hydrolysis<sup>42</sup>. Previous studies have shown that overexpression *CEP1* advanced the tapetal cell  
327 wall degeneration to early S7, while *cep1* mutant lacking functional *CEP1* failed tapetum  
328 degeneration<sup>42</sup>. Generally, tapetum degeneration accompanies with tapetum cell wall  
329 degradation<sup>42</sup>. Therefore, ~16-fold down-regulated *CEP1* together with a large number of cell  
330 wall modification associated genes (Supplementary Table 4) supports the observed impairment  
331 of tapetal cell degradation (Fig. 3d; Supplementary Fig. 7).

332 In addition to the above genes, *AtRALF4/8/9/19/25* down-regulated in four tapetum  
333 mutants<sup>12</sup>, were also found in our down DEGs (Table 2; Supplementary Table 4). Their down-  
334 regulation was further confirmed by RT-qPCR showing similar fold reductions in their  
335 expressions (Table 2). These *AtRALFs* might be responsible for cell-to-cell communication  
336 between tapetal cells and pollen cells, an important process for pollen development. Their real  
337 functions however, have not been investigated yet<sup>12</sup>.

338

339 **Overexpressing EaF82 reduced proteasome activity and decreased ATP levels.** The tapetum  
340 degeneration is a process resembling apoptosis-like PCD<sup>41</sup>, and is essential for pollen  
341 development<sup>43</sup>. Pollen abortion has been observed with delayed tapetum PCD<sup>44</sup>. Both proteases  
342 and proteasomes are critical to the progression of tapetum PCD<sup>43,45</sup>. Besides *CEP1*, there are  
343 seven additional downregulated DEGs encoding proteases (Supplementary Table 4), suggesting  
344 that PCD processes may be defective. Although no proteasome genes were found in our DEGs,  
345 we examined the translational abundance of three subunits (Rpn6, Rpn10 and Rpt5) of the  
346 proteasome by immunoblotting, and the proteasome activity in the early development of flowers.  
347 Among them, Rpt5a is one of the six AAA-ATPases of proteasome and essential for pollen  
348 development<sup>46</sup>. Immunoblotting showed no differences in their protein abundances (Fig. 6a).  
349 However, the proteasome activity in TC-1 and TC-2 lines was reduced by 33% and 49%  
350 compared to the WT, or by 48% and 60% compared to the vector control, respectively (Fig. 6b).

351 The results of reduced proteasome activity prompted us to further examine ATP levels  
352 because PCD is an energy dependent process and its initiation and execution are affected by  
353 ATP, Ca<sup>2+</sup> and NO<sup>47,48</sup>. Moreover, the proteasome assembly and activities are also ATP-  
354 dependent<sup>49</sup>. With the same tissues used for examining proteasome subunits and proteasome  
355 activity, the ATP levels were found to be indeed reduced by 38% and 57% compared to the WT,  
356 or 46% and 63% compared to the vector control, respectively (Fig. 6c). Their similar trends of  
357 reduction suggested that the reduced proteasome activity was likely the result of low ATP supply  
358 at the early developmental stages of flowers even though no DEGs directly linked to ATP  
359 production, such as genes coding for ATP synthases, were found. ATP serves not only as an  
360 intracellular energy molecule, but also as a signal molecule in the extracellular matrix of plant  
361 cells through coordinating with Ca<sup>2+</sup> and ROS<sup>50,51</sup>. ATP defective mutants are male sterile<sup>52,53</sup>,  
362 while elevated ATP increases seed yields<sup>54</sup>. ATP deficiency in TC lines is also consistent with  
363 many of observed down-regulated DEGs, which encode proteins directly or indirectly affected  
364 by ATP, such as six ATP-binding cassette (ABC) transporters and six H<sup>+</sup>-ATPases, as well as a  
365 group of ATP-binding receptor-like protein kinases (Table 1; Supplementary Table 4). These  
366 results suggest that overexpressing EaF82 lowered ATP levels, and triggered down-regulation of  
367 genes encoding for ATP-binding proteins which in turn affected PCD activity and resulted in  
368 delaying tapetum degeneration. Additionally, tapetum degeneration is essential for releasing  
369 nutrients to support pollen grain development and maturation<sup>39,40</sup>. In the DEG, a large number of

370 genes encoding transporters and transmembrane proteins for shuttling sugars, amino acids, and  
371 ions were also found to be down-regulated (Supplementary Table 4), suggesting that the nutrient  
372 transport probably was limited to the developing pollen grains.

373

374 **Interacting partners of EaF82.** To understand how overexpressing EaF82 causes a decrease in  
375 ATP levels and down-regulation of so many genes, we conducted Y2H screening followed by 1-  
376 by-1 interaction validation assay with *EaF82-S* as the “bait” and a cDNA library made from  
377 Arabidopsis mitotic flower buds as the “prey” to identify the EaF82 interacting partners. Using  
378 the PBS (Predicted Biological Score) system, a total of 46 EaF82 interacting proteins with score  
379 A, B, C and D were obtained as good candidates (Supplementary Table 6). Based on their  
380 biological functions and cellular components from published studies, seven candidates ABCF4,  
381 ALATS, FKBP-like peptidyl-prolyl cis-trans isomerase family protein, PAPP2C, TCH4,  
382 AKIN10 and SYTA (Supplementary Table 7) were selected to perform 1-by-1 Y2H validation  
383 assay. The assay results were shown in Supplementary Fig. 10 and summarized in  
384 Supplementary Table 8. Among the seven candidates, we found three: ABCF4, PAPP2C and  
385 AKIN10, to have the strongest interactions (Supplementary Fig. 10; Supplementary Table 8).  
386 ABCF4 (AT3G54540, also named as AtGCN4) is an ATPase and regulates plasma membrane  
387 H<sup>+</sup>-ATPase activity<sup>55</sup>, PAPP2C (AT1G22280) is a protein phosphatase<sup>56</sup> while AKIN10  
388 (AT3G01090) is a major cellular energy sensor in plants and orthologous to mammalian AMP-  
389 activated protein kinase (AMPK)<sup>57</sup>.

390 Given the key role of AKIN10 as the energy sensor in plants and its orthologous to  
391 mammalian AMPK, the interaction between AKIN10 and EaF82 (Fig. 7a) could be critical and is  
392 likely to be responsible for observed ATP deficiency, and aberrant tapetum degradation and  
393 pollen development. ABCF4 could be also involved in the EaF82-induced intracellular pH  
394 increase leading to cell wall modification. To elucidate the observed induced ATP deficiency  
395 (Fig. 6b), therefore, we focused on AKIN10 and performed co-IP analysis to validate its  
396 interaction with EaF82.

397 An initial attempt to directly detect EaF82 in the pull-downed AKIN10 and EaF82 complex  
398 from extracts of TC transgenic floral tissues was unsuccessful despite both AKIN10 and EaF82  
399 were detectable in the total protein extracts. Since the *EaF82-S* without signal peptide was used  
400 for alkalinizing activity assay and in Y2H analysis, both the vector control (C) and TC transgenic

401 line extracts were spiked with EaF82-S peptide and then co-IP performed. The idea was that if  
402 AKIN10 is indeed an interacting partner of EaF82, the added EaF82-S peptide should form a  
403 complex with endogenous AKIN10, and by co-IP with anti-AKIN10 antibody, the complex  
404 should be able to pull-down. Consistent with this idea, we were able to pull-down AKIN10-  
405 EaF82-S complex from both the vector control and TC transgenic line extracts (Fig. 7b; lanes 4  
406 and 7). Under the same incubation conditions without the anti-AKIN10 antibody, neither  
407 AKIN10 nor EaF82 was detected (Fig. 7b; lanes 3 and 6) while EaF82 was not detected when  
408 EaF82-S was incubating with protein A/G magnetic bead suspension (Fig. 7b; lane 8), indicating  
409 that no adsorption of AKIN/10 or EaF82-S to protein A/G magnetic beads occurred. The  
410 detected EaF82 (Fig. 7b; lane 4 and 7) could only be pull-downed by the anti-AKIN10 bound  
411 protein A/G magnetic beads when it was present in the complex with AKIN10. These results  
412 indicate that AKIN10 can interact with EaF82, supporting the Y2H finding.

413

414 **Elevated levels of AKIN10 in the ATP-deficient *EaF82* transgenic flowers.** In mammals, the  
415 level of AMPK is increased when the AMP/ATP ratio is high, resulting in phosphorylation of  
416 multiple downstream targets to increase ATP production and decrease ATP consumption<sup>58</sup>. In  
417 plants, the level of AMPK homolog AKIN10 is also increased as the AMP/ATP ratio increases,  
418 while its gene expression level remains constant<sup>59</sup>. In addition, it has been reported that  
419 overexpression of *AKIN10* resulted in late flowering and defective silique development<sup>60,61</sup>. For  
420 the identified EaF82 interacting partner AKIN10 (Fig. 7a, b), its gene *AKIN10* and another  
421 member *AKIN11* were detected in our RANseq analysis but not differentially expressed  
422 (Supplementary Data Set 1). AKIN10 has also been reported to be degraded in a proteasome-  
423 dependent manner<sup>62</sup> and induced by low energy conditions such as dark growth and hypoxia<sup>59,63</sup>.  
424 To determine whether reduced ATP level and proteasome activity cause elevation of AKIN10  
425 levels, we used immunoblotting with anti-AKIN10 antibody and discovered that TC-1 and TC-2  
426 had an average of ~4-fold higher levels of AKIN10 and ~2-fold higher levels of AKIN11  
427 compared to WT and vector control (Fig. 7c). These results are in agreement with the status of  
428 low ATP and reduced proteasome activity in transgenic lines (Fig. 6b, c).

429

430 **DISCUSSION**

431 *EaF82* is a novel gene differentially expressed between green and yellow/white sectors of  
432 variegated ‘Golden Pothos’ leaves with its transcript and protein accumulation elevated in color  
433 defective sectors in comparison with their green counterparts<sup>16</sup>. *EaF82* contains no intron<sup>16</sup>, and  
434 encodes a 120 amino acid long peptide with a 30 amino acid signal peptide at the *N*-terminus and  
435 four cysteine residues (Fig. 1a), sharing the typical features with numerous plant RALFs<sup>19</sup>. In  
436 present study, *EaF82* identity as a member of RALF family was verified by its rapid  
437 alkalinization capacity (Fig. 1b, c), a hallmark of most RALFs<sup>7</sup>, and its overexpression to affect  
438 cellular pH regulation and cell wall modification related genes (Table 1; Supplementary Table  
439 4). Phylogenetic analysis indicated that it belongs to clade IV (Fig. 1d), the least characterized  
440 group of RALFs. Clade IV members are mainly expressed in reproductive tissues<sup>5</sup>, but under  
441 certain conditions they may be induced in other tissues. For example, *AtRALF8* reported to be  
442 abundant in pollen<sup>13</sup> while it was also found to be induced in roots during drought and nematode  
443 infection<sup>64</sup>. In ‘Golden Pothos’, a shy-flowering plant<sup>15</sup>, *EaF82* expression correlates with IAA  
444 distribution in vegetative parts with no known function<sup>16</sup>. Here, we demonstrated that  
445 overexpression of *EaF82* in *Arabidopsis* impaired tapetum degeneration resulting in low pollen  
446 production and seed-setting, but appeared not to inhibit growth in any vegetative parts (Fig. 5c),  
447 including seedlings (Supplementary Fig. 5a).

448 In flowering plants, pollen development occurs in anther as a complex process from initial  
449 microsporogenesis to the production of mature pollen grains<sup>26,65</sup>. During this development, the  
450 sporophytic anther tissues, in particular the tapetum cell layer, play an essential role with the  
451 involvement of many genes to regulate developmental process, and provide materials for pollen  
452 wall formation<sup>12,65</sup>. Our histological analysis showed that the tapetum degeneration was impaired  
453 in TB lines (Fig. 3d; Supplementary Fig. 7). The impairment of tapetum degeneration by *EaF82*  
454 was further supported by our RNAseq and RT-qPCR results wherein we found that a group of  
455 *RALFs* reported in *Arabidopsis* tapetum mutants<sup>12</sup> were also down-regulated in our transgenic  
456 lines. In addition, *CEP1* and seven additional protease genes identified in our down-regulated  
457 DEGs are involved in tapetum PCD, suggesting that they might be involved in impairing  
458 tapetum degeneration and causing reduction in nutrient supply to timely support pollen wall  
459 formation. Moreover, the down-regulation of seven *AGPs* that are important for pollen wall  
460 formation<sup>36</sup> and many DEGs involved in nutrient transports (Supplementary Table 4) support our  
461 observed pollen formation defect (Fig. 3d; Supplementary Fig. 7). As for pollen development,

462 many genes encoding PME and PMEI for cell wall modification<sup>30</sup> and a group of auxin-  
463 responsive genes essential for pollen development<sup>66</sup> were in down-regulated DEGs  
464 (Supplementary Table 4). Moreover, 21 transcription factors, including some known to regulate  
465 pollen formation and be pollen-specific, were also in down-regulated DEGs (Supplementary  
466 Table 4). All of these down-regulated genes lead us to conclude that *EaF82* compromised pollen  
467 formation via the impairment of tapetum degeneration.

468 In addition, our RNAseq and RT-qPCR data showed that the overexpression of *EaF82*  
469 resulted in the repression of seven *AtRALF* genes (*AtRALF4/8/9/15/19/25* and *At4g14020*) (Table  
470 2). This intriguing phenomenon could be due to a feedback mechanism for regulating the  
471 expression of endogenous *AtRALFs*. Once these seven *AtRALF* propeptides undergo proteolytic  
472 processing to become mature peptides, they all have calculated molecular weights between 6.6 to  
473 8.7 kD and pIs (isoelectric points) greater than 7 (9.3 - 10.6), indicating that they are basic small  
474 peptides (Table 2). Mature *EaF82* (*EaF82-S*) also has a calculated pI of 8.7. It is possible that the  
475 overexpressed *EaF82* peptide with higher accumulation levels and positive charge might  
476 compete with these *AtRALFs* to bind to their interacting partners and affect regulatory pathways  
477 leading to their transcriptional repressions. Nevertheless, the regulatory mechanism of *EaF82* on  
478 the down-regulation of these *AtRALFs* needs future study.

479 Concerning the action mode of *EaF82*, the Y2H assay identified AKIN10 as an interacting  
480 partner (Fig. 7a). AKIN10 is a catalytic  $\alpha$ -subunit of SnRK1 complex that comprises of an *N*-  
481 terminal Ser/Thr kinase domain, an adjacently linked ubiquitin-associated (UBA) domain, and a  
482 large *C*-terminal regulatory domain involved in the interaction with the regulatory ( $\beta$  and  $\gamma$ )  
483 subunits and upstream phosphatases<sup>63</sup>. *AKIN10* is expressed in flowers, anthers, and pollen<sup>67,68</sup>.  
484 Under normal conditions, AKIN10 is localized mainly in cytosol<sup>69</sup>. Our co-IP assay validated the  
485 interaction between *EaF82* and AKIN10 (Fig. 7b). In *EaF82* overexpressed lines, it is reasonable  
486 to assume that *EaF82* binds to AKIN10 and modulates SnRK1 kinase activity and  
487 phosphorylation of downstream targets leading to transcriptomic changes. Although we did not  
488 examine any phosphorylation changes of proteins downstream of SnRK1, we did observe ~5%  
489 transcriptomic changes at the early developmental stages of transgenic flowers overexpressing  
490 *EaF82*. Our Y2H results showed that *EaF82* interacted with AKIN10 through its *C*-terminal end,  
491 which contains kinase associated domain 1 (KA1, position 492-533) (Supplementary Fig. 11).  
492 The KA1 is a conserved domain of AMPKs from yeast to humans involved in autoinhibition,



493 tethering of acidic phospholipids and binding of peptide ligands<sup>70</sup>. Whether EaF82 binds to the  
494 KA1 domain to affect SnRK1 activity needs further investigation as the function of KA1 domain  
495 in AKIN10 is still unclear<sup>63</sup>.

496

## 497 **Materials and Methods**

498 **Construction of genetic cassettes.** Three pBI121 vector-based new genetic cassettes  
499 *EaF82p::EaF82-sGFP*, *35Sp::EaF82-sGFP* and *35Sp::EaF82* (designated as TA, TB and TC)  
500 were created in this study (Supplementary Fig. 2). The genetic cassette *EaF82p::GUS* was  
501 created in previous study<sup>16</sup>. The vector pBI121 carrying the *CaMV35S* promoter (*35Sp*) driving  
502 bacterial *uidA* (*GUS*) (*35Sp::GUS*) was used as a control (designated as C). To create these  
503 genetic cassettes, the intronless gene, *EaF82*, previously isolated from *E. aureum* containing a  
504 1.2 kb *EaF82* promoter and a 0.8 kb full length *EaF82* including *EaF82* terminator<sup>16</sup> was used.  
505 The two previously constructed plasmid DNAs, CEJ826 and CEJ937 (CEJ # is a nomenclature  
506 for plasmid DNA in Xie's laboratory), and the pBI121 vector were used to construct these  
507 genetic cassettes. The plasmid DNA CEJ826 contains the *EaF82* promoter (*EaF82p*) and full  
508 length *EaF82* including *EaF82* terminator in pCR®-blunt 3.5 kb vector (Invitrogen). The  
509 plasmid DNA CEJ937 contains *35Sp* and 0.357 kb *EaF82* coding region without TGA stop  
510 codon in-frame fused with *sGFP* in pUC19 (Invitrogen). To construct the TC genetic cassette,  
511 the *EaF82* fragment isolated from CEJ826 by EcoRI-blunted and EcoRV digestion was ligated  
512 to vector pBI121 pre-digested by SacI-blunted and SmaI. The resultant contained *35Sp* driving  
513 full length *EaF82* including *EaF82* terminator. To construct the TB genetic cassette, the  
514 *35Sp::EaF82-sGFP-NosT* fragment isolated from CEJ937 by HindIII and EcoRI digestion was  
515 ligated to pBI121 pre-digested by HindIII and EcoRI. The resultant plasmid DNA was named  
516 CEJ964. To construct the TA genetic cassette, the *EaF82* promoter fragment isolated from  
517 CEJ826 by XbaI and EcoRV digestion was ligated to pre-digested CEJ964 by HindIII-blunted  
518 and XbaI. The resultant construct TA had *EaF82-sGFP* driven by *EaF82p*, whereas TB had the  
519 same *EaF82-sGFP* but driven by *35Sp*. The *Agrobacterium* strain LBA4404 was used to harbor  
520 these constructs.

521

522 **Created transgenic plants.** Transgenic plants were generated with *Arabidopsis thaliana* Col-0,  
523 *Nicotiana benthamiana* tobacco using previously described transformation methods<sup>16,71</sup> except

524 the kanamycin concentration for selection in *N. benthamiana* was 300 mg/L. The Arabidopsis  
525 *EaF82p::GUS* transgenic plants were created previously<sup>16</sup>. All experiments were performed  
526 using homozygous lines.

527

528 **Alkalinization assay.** The alkalinization assay was performed with tobacco (*Nicotiana*  
529 *tabacum*, W38) suspension-cultured cells (Supplementary Fig. 1b) derived from leaf calli  
530 following the method described by Pearce et al.<sup>7</sup>. The EaF82-S peptide (Fig. 1a) was synthesized  
531 by Lifetein (Somerset, NJ, USA) with a purity of 94.55%. Its molecular weight was 10 kD as  
532 confirmed by an Electrospray Ionization (ESI) Mass Spectrometry. Alkylated EaF82-S peptide  
533 was prepared as previously reported<sup>7</sup> and used as a negative control. Initial 70 ml of suspension  
534 cells (OD<sub>600</sub>=0.2) in liquid medium, pH 5.6 containing MS basal salts and vitamins (Research  
535 Product International), were grown in a 300 ml flask under dark at 25°C with shaking at 160 rpm  
536 till the cell density reached 5-8 x 10<sup>4</sup> cluster cells/ml after 3-4 days of subculture. For the assay,  
537 each 10 ml cell suspension was aliquoted into a 6-well plate and acclimated with shaking for 2-3  
538 h. The peptide was reconstituted in ddH<sub>2</sub>O to give a concentration of 100 µM as a stock solution.  
539 Peptide concentrations of 1, 5, 10, 50 and 100 nM were used for assay. The pH was measured by  
540 a Mettler Toledo<sup>TM</sup> InLab 413 pH Electrodes (Mettler-Toledo).

541

542 **RT-PCR and RT-qPCR.** The procedures for RNA isolation, RT-PCR and RT-qPCR were the  
543 same as described in Hung et al.<sup>14</sup>. Data from three sets of biological samples were averaged.  
544 The primers are listed in Supplementary Table 9. The QuantumRNA<sup>TM</sup> Universal 18S Internal  
545 Standard (Invitrogen) was used as an internal control.

546

547 **RNAseq and DEG analyses.** The Illumina sequencing was performed by DNA-Link (San  
548 Diego, CA, USA). The sequencing reactions were run on the Illumina NextSeq 500 with single-  
549 end 76 bp read. The Consensus Assessment of Sequence and Variation (CASAVA) software  
550 version 1.8.2 (Illumina) was used to remove adaptor sequences, nucleotide library indexes and  
551 generate fastq files. The RNAseq reads were mapped to the *A. thaliana* reference genome  
552 TAIR10 by TopHat<sup>72</sup> to produce aligned reads and FPKM<sup>73</sup>. The gene annotations were based on  
553 NCBI database. The DEG analysis was conducted by Cufflinks and Cuffdiff<sup>72</sup>. The PANTHER  
554 classification system was used for functional pathway analysis<sup>27</sup>.

555

556 **Protein isolation, SDS-PAGE and immunoblotting.** For extracting total proteins from leaves  
557 and seedlings, Plant Total Protein Extraction Kit (Sigma-Aldrich) was used. For extracting  
558 pollen proteins, the method was adopted from Chang & Huang<sup>74</sup>. In brief, hundreds of opened  
559 flowers were harvested in an ice-cold tube. About 5x volume of cold extraction buffer (HEPES  
560 potassium solution) was added. After brief mixing, the mixture was centrifuged at 350 g for 1  
561 min to collect pollen. The purity of collected pollen was examined under a microscope  
562 (Supplementary Fig. 1c) before disruption by a blue pestle on ice. After 1 h incubation on ice,  
563 extracted pollen proteins in the supernatant were collected following centrifugation at 18,000 g  
564 for 30 min at 4°C. For extracting proteins from unopened flower clusters, tissues ground in liquid  
565 nitrogen were mixed in 1:2.5 ratio with extraction buffer containing 50 mM HEPES pH 7.8, 2  
566 mM EDTA, 1 mM DTT and 1x Halt™ Protease Inhibitor Cocktail, EDTA-free (Thermo  
567 Scientific). After centrifugation at 18,000 g for 20 min at 4°C, the protein extracts were  
568 collected.

569 SDS-PAGE, immunoblotting and the subsequent detection of chemiluminescent signals  
570 along with staining of blots were performed as previously described<sup>16</sup>. To detect EaF82, custom-  
571 made anti-EaF82 antibody was used<sup>16</sup>. To detect GFP, the blots were probed with 1:200 diluted  
572 mouse monoclonal anti-GFP (sc-9996, Santa Cruz Biotechnology). After three washes with  
573 TBST, blots were incubated with 1:10,000 diluted HRP-conjugated anti-mouse IgGκ (sc-516102,  
574 Santa Cruz Biotechnology). For detecting AKIN10, the blots were probed with 1:500 diluted  
575 anti-AKIN10 (AS10919, Agrisera) in PBST containing 1% dry-milk, followed by the 1:20,000  
576 diluted HRP-conjugated anti-rabbit IgG (H+L) (AS014, ABclonal). For quantification of band  
577 intensity, the same blot was probed with 1:15,000 diluted plant actin mouse mAb (AC009,  
578 ABclonal) as an internal control, followed by the 1:20,000 diluted HRP-conjugated anti-mouse  
579 IgG (Jackson ImmunoResearch). Three independent experiments were performed and scanned  
580 images of band intensities on X-ray films were quantified using Image J  
581 (<https://imagej.nih.gov/ij/>). For examining the proteasome subunits, the same procedure used for  
582 detecting AKIN10 was also used except for the incubation conditions for each primary antibody.  
583 Anti-RPN6 (AS15 2832A, Agrisera) was 1:1,000 diluted in TBST containing 3% dry-milk and  
584 incubated at 23°C for 1 h. Anti-RPN10 (PHY0102S, PhytoAB) was 1:2,000 diluted in TBST and

585 incubated at 23°C for 1 h. Anti-Rpt5a/b (PHY1747A, PhytoAB) was 1:1,000 diluted in PBST  
586 and incubated at 4°C for 16 h.

587 To determine the size of EaF82, the Novex™ tricine gel system (Invitrogen) for revealing  
588 low molecular weight proteins was used. In brief, extracted proteins were first mixed with equal  
589 volume of tricine SDS sample buffer containing 50 mM DTT. Before loading onto 16% tricine  
590 gel, the sample mixtures were denatured at 85°C for 2 min. The Spectra™ Multicolor Low  
591 Range Protein Ladder, a mixture of six proteins ranging from 1.7 to 40 kD, was used as size  
592 standards. Proteins were separated in tricine SDS running buffer under constant 50 volts for 4 h  
593 and later increasing to 100 volts for 1 h. They were then transferred to 0.2 µm PVDF membrane  
594 in Novex Tris-Glycine transfer buffer with 20% methanol under constant 20 volts for 90 min.  
595 Immunoblotting was performed as described for detecting EaF82.

596

### 597 **Histological analysis and seed counting**

598 GUS assay was performed as previously described<sup>16</sup>. To detect GFP, tissues were observed  
599 directly under a fluorescence stereo microscope Nikon SMZ1000 (Nikon) equipped with ET-  
600 Narrow Band EGFP to minimize autofluorescence ex 480 nm/20 and em 510 nm/20 (49020,  
601 Chroma Technology). The images were taken by Nikon Digital Sight DS-Fi1 and analyzed by  
602 software NIS-ELEMENTS BR 3.0 (Nikon). To observe pollen, pollen grains were released by  
603 gently crushing the anthers on slides. For observing pollen germination, the method described by  
604 Krishnakumar & Oppenheimer<sup>75</sup> was used to prepare slides containing germinated pollen grains.  
605 The pollen images were observed under a Zeiss LSM 710 microscope with ZEN software  
606 (Zeiss). For pollen viability assay, the stamens were tapped on a drop of iodine/potassium iodide  
607 TS 1 solution (RICCA chemical company) placed on a glass slide. After 5 min in dark, the  
608 pollen grains were imaged under a Keyence BZ-X700 microscope (Keyence). To observe pollen  
609 development, the whole unopened flower cluster was fixed in FAA solution (4% [v/v]  
610 formaldehyde, 5% [v/v] acetic acid and 50% [v/v] ethanol) with gentle vacuum for 5 min then  
611 kept at 4°C for 24 h. The dehydration, paraffin embedding, and sectioning steps were the same  
612 as described by Hung et al.<sup>15</sup>. After immobilizing on slides, the deparaffinized specimens were  
613 stained for 2-3 min with fresh 0.05% (w/v) Toluidine blue O solution in 0.1 M citrate phosphate  
614 buffer, pH 6.8 and then rinsed in running water. After mounting on Fluoromount (Sigma-

615 Aldrich), the images were taken by a Keyence BZ-X700. For counting seeds, the images of seeds  
616 were counted by VisionWork®LS software (UVP).

617

618 **ATP measurement.** The method of ATP measurement was adopted from Napolitano & Shain<sup>76</sup>.  
619 In brief, ATP was extracted by mixing 1 mg of tissue powder with 40 µl of 50 mM HEPES  
620 buffer, pH 7.4 containing 33 mAU/ml Novagen® proteinase K (Millipore). The mixture was  
621 incubated at 50°C for 15 min then at 80°C for 5 min. After centrifugation at 20,000 g for 10 min  
622 at 4°C, the supernatant was collected and used for ATP assay using an adenosine 5-triphosphate  
623 (ATP) bioluminescent assay kit (Sigma-Aldrich). The generated bioluminescence signal was  
624 measured with a SpectraMax M5 plate reader (Molecular Devices).

625

626 **Proteasomal activity assay.** Proteasomal activity was assayed as described by Vallentine et  
627 al.<sup>77</sup> except that 10 mM ATP and 5% (v/v) glycerol were included in the extraction buffer but  
628 omitted in the reaction buffer. Each assay had equal amounts of extracted proteins (3 µg). The  
629 generated signal was measured using a microplate reader PHERAstar (BMG Labtech).

630

631 **Yeast two-hybrid.** The Y2H screening and 1-by-1 direct interaction assays were conducted by  
632 Hybrigenics Services SAS (Paris, France). The coding sequence for EaF82 (amino acid residues  
633 30-120) was PCR-amplified from previously constructed CEJ982 containing *EaF82*, and cloned  
634 in frame with the LexA DNA binding domain (DBD) into pB27 vector as a C-terminal fusion to  
635 LexA (N-LexA-EaF82-C). Hybrigenics' reference for this construct was hgx4998v1\_pB27. The  
636 entire insert sequence in the construct was confirmed by sequencing and then used as a bait to  
637 screen a random-primed *Arabidopsis thaliana* meiotic buds cDNA library constructed into pP6  
638 vector. Cloning vectors pB27 and pP6 were derived from the original pBTM116<sup>78</sup> and  
639 pGADGH<sup>79</sup> plasmids, respectively.

640 The N-*LexA-EaF82-C* bait was tested in yeast and found neither toxic nor autoactivating by  
641 itself. Therefore, it was used for the ULTimate Y2H<sup>TM</sup> screening. A total of 115 million clones  
642 (11-fold the complexity of the library) were screened using a mating approach with YHGX13  
643 (Y187 *ade2-101::loxP-kanMX-loxP*, *mata*) and L40ΔGal4 (*mata*) yeast strains as previously  
644 described<sup>80</sup>. A total of 271 His<sup>+</sup> colonies were selected on a medium lacking tryptophan, leucine  
645 and histidine. The prey fragments of positive clones were amplified by PCR and sequenced at

646 their 5' and 3' junctions. The obtained sequences were subjected to search the corresponding  
647 interacting protein in the GenBank database (NCBI) using a fully automated procedure. A  
648 confidence PBS score, which relies on both local and global scores, was assigned to each  
649 interaction as described by Formstecher et al.<sup>81</sup>. Briefly, the local score was analyzed by  
650 considering the redundancy and independency of prey fragments, as well as the distribution of  
651 reading frames and stop codons in overlapping fragments. Then, the global score was analyzed  
652 by taking into consideration of the interactions that were found in all the screens performed at  
653 Hybrigenics using the same library. The global score indicates the probability of a nonspecific  
654 interaction. The PBS scores were divided into six categories (A to E) for practical use purpose.  
655 Category A represents the highest confidence while D stands for the lowest confidence.  
656 Moreover, the category E specifically flags interactions involving highly connected prey  
657 domains previously found several times in screens performed on libraries derived from the same  
658 organism, while F stands for a false-positive with several of these highly connected domains that  
659 have been confirmed as false-positives of the technique. The PBS scores have been reported to  
660 correlate with the biological significance of interactions well<sup>82,83</sup>. Interacting proteins with PBS  
661 scores A, B, C and D all have been confirmed to have biological relevance independently<sup>82</sup>.  
662 Therefore, all interacting proteins with PBS scores A, B, C and D could be considered as good  
663 candidates.

664 Using PBS score system, seven candidates were selected from the obtained EaF82  
665 interacting proteins with score A, B, C and D (marked as P in Supplementary Table 7) to further  
666 perform 1-by-1 Y2H assay for validation. This direct 1-by-1 interaction assay was performed.  
667 Seven fragments were extracted from the ULTImate Y2H™ screening and cloned in frame with  
668 the Gal4 activation domain (AD) into plasmid pP7. The AD construct was checked by  
669 sequencing the 5' and 3' ends of the inserts. Hybrigenics' references for these seven preys are  
670 listed in Supplementary Table 7.

671 To perform 1-by-1 pairwise Y2H interaction assays, the bait and prey constructs were  
672 transformed into the yeast haploid cells L40ΔGal4 (mata) and YHGX13 (Y187 ade2-101::loxP-  
673 kanMX-loxP, mata), respectively. These assays were based on the HIS3 reporter gene (growth  
674 assay without histidine). As negative controls, the bait plasmid was tested in the presence of  
675 empty prey vector (pP7) and all prey plasmids were tested with the empty bait vector (pB27).  
676 The interaction between SMAD and SMURF was used as the positive control<sup>84</sup>. Interaction pairs

677 were tested in duplicate as two independent clones (clone 1 and clone 2) for the growth assay.  
678 For each interaction, undiluted and  $10^{-1}$ ,  $10^{-2}$ ,  $10^{-3}$  dilutions of the diploid yeast cells (culture  
679 normalized at  $5 \times 10^7$  cells/ml) expressing both bait and prey constructs were spotted on several  
680 selective media. The DO-2 selective medium lacking tryptophan and leucine was used as a  
681 growth control to verify the presence of both the bait and prey plasmids. The different dilutions  
682 were also spotted on a selective medium without tryptophan, leucine and histidine (DO-3). Four  
683 different concentrations (1, 5, 10 and 50 mM) of 3-AT, an inhibitor of the HIS3 gene product,  
684 were added to the DO-3 plates to increase stringency and reduce possible autoactivation by the  
685 bait and prey constructs. The “DomSight” (Hybrigenics Services, SAS) displaying the  
686 comparison of the bait fragment and the Selected Interacting Domain (SID) of the prey proteins  
687 with the functional and structural domains (databases of protein domains: PFAM, SMART,  
688 TMHMM, SignalP, Coil algorithms) on these proteins were used for data visualization.

689

690 **Co-immunoprecipitation (co-IP) analysis.** To validate the interaction between EaF82 and  
691 AKIN10, co-IP analysis was performed. Each 333 mg ground floral tissues from Arabidopsis  
692 vector control or TC transgenic line was resuspended in 1 ml of extraction buffer (50 mM Tris-  
693 HCl, pH 7.5 containing 150 mM NaCl, 0.05% Triton-X100, 10% glycerol, and both protease and  
694 phosphatase inhibitor cocktail) and kept on ice for 30 min for soaking. The samples were then  
695 homogenized using a BeadBug 6 microtube homogenizer (Benchmark Scientific) and  
696 centrifuged at 15,000 g for 10 min. The clear extracts were transferred to new tubes and  
697 centrifuged again to remove particulates. The clear extracts were transferred to new tubes.

698 To prepare the input samples, each 100  $\mu$ l clear extracts was mixed with 37  $\mu$ l of 4X LDS  
699 sample buffer (NuPAGE™, Invitrogen, USA) and 15  $\mu$ l 10X reducing agent. The mixture was  
700 then heated at 70°C for 10 min and stored at -20°C until analysis. The remaining extracts were  
701 used for co-IP. First, both control and TC extracts were split into two 250  $\mu$ l fractions. They then  
702 were spiked with or without 20  $\mu$ g of EaF82-S peptide and divided into two tubes. After that, one  
703 tube was added 10  $\mu$ g of anti-AKIN10 antibody (Cedarlane, USA) while the other tube received  
704 none (as a negative control). Another control was prepared by adding EaF82-S peptide alone to  
705 protein A+G magnetic beads. All samples were gently shaken overnight at 4°C for binding. After  
706 that, 50  $\mu$ l of protein A/G magnetic beads pre-equilibrated with extraction buffer were added and  
707 incubated further for 3 h. After binding, all samples were centrifuged at 800 g for 1 min to

708 separate beads. The supernatant was removed and the beads were first washed thrice with 400  $\mu$ l  
709 of extraction buffer, followed by two washes with 0.1M Tris-HCl buffer, pH 7.5. The bound  
710 complex was released from beads by adding 150  $\mu$ l of preheated (70°C) 4X LDS sample buffer  
711 and centrifuged at 10,000 g for 5 min. The eluates were then transferred to new tubes, mixed  
712 with 15  $\mu$ l of 10X reducing agent (NuPAGE™, Invitrogen), and heated at 70°C for 10 min.  
713 Immunoblotting was then performed to detect EaF82 and AKIN10 in the eluate. Briefly, 20  $\mu$ l of  
714 input and 30  $\mu$ l of co-IP samples were loaded onto a 12% NuPAGE™ Bis-Tris gel (Invitrogen)  
715 and separated at 200 V for 40 min. Following separation, the proteins were transferred onto a  
716 PVDF membrane overnight at 4°C. The membrane was then blocked with fat-free milk powder  
717 in PBST (1%) for 1 h at room temperature, and then was first incubated with rabbit anti-AKIN10  
718 antibody (1:500 dilution) followed by incubation with Veriblot IP detection reagent (Abcam,  
719 1:500 in blocking solution). Protein bands were detected with Supersignal™ west pico  
720 chemiluminescent substrate (Thermofisher) and images were captured with the iBright™  
721 CL1500 imaging system (Thermofisher). To detect EaF82, the above blot was first stripped with  
722 Restore™ stripping buffer (Thermofisher), washed thrice for 10 min each with 1X PBST, and  
723 then blocked as described above. The remainder of the procedure to detect EaF82 was the same  
724 as described earlier.

725

726 **Peptide sequence analysis and phylogenetic tree construction.** The SignalP 5.0  
727 (<http://www.cbs.dtu.dk/services/SignalP/>)<sup>17</sup> was used to predict the signal peptide. The Swiss  
728 Institute of Bioinformatics Expasy server ([https://web.expasy.org/compute\\_pi/](https://web.expasy.org/compute_pi/))<sup>85</sup> was used to  
729 predict pI and molecular weight. The construction of two phylogenetic trees was carried out  
730 following the information and procedures provided in Campbell & Turner<sup>5</sup> except skipping a  
731 manual optimization; and MEGA X<sup>21</sup> was used to perform evolutionary analysis of Arabidopsis  
732 clade IV-C RALFs with EaF82.

733

734 **Statistical analysis.** Statistical analysis was performed with one-way ANOVA and Fisher's least  
735 significant difference (LSD) test. The GraphPad Prism 7 (GraphPad Software) was used for  
736 calculating Michaelis–Menten constant (Km) and Vmax as well as statistic best fit value of R  
737 square and standard deviation of estimation (Sy.x).

738



739 **Data availability.** Arabidopsis Genome Initiative locus identifiers for each gene mentioned in  
740 this study are listed in Tables 1 and 2; Supplementary Tables 2, 3, and 4; Supplementary Data  
741 Sets 2 and 3. The accession number of *EaF82* is FJ666044. Raw data obtained from RNAseq  
742 analysis have been deposited into NCBI's Gene Expression Omnibus under the accession codes  
743 GSE171459 (<https://www.ncbi.nlm.nih.gov/geo/>).

744

## 745 **References**

- 746 1. Pearce, G., Strydom, D., Johnson, S. & Ryan, C. A. A polypeptide from tomato leaves  
747 induces wound-inducible proteinase inhibitor proteins. *Science* **253**, 895-7 (1991).
- 748 2. Olsson, V. et al. Look closely, the beautiful may be small: precursor-derived peptides in  
749 plants. *Annu. Rev. Plant Biol.* **70**, 153-186 (2019).
- 750 3. Murphy, E., Smith, S. & De Smet, I. Small signaling peptides in Arabidopsis  
751 development: how cells communicate over a short distance. *Plant Cell* **24**, 3198-3217  
752 (2012).
- 753 4. Sharma, A. et al. Comprehensive analysis of plant rapid alkalization factor (RALF)  
754 genes. *Plant Physiol. Biochem.* **106**, 82-90 (2016).
- 755 5. Campbell, L. & Turner, S. R. A comprehensive analysis of RALF proteins in green plants  
756 suggests there are two distinct functional groups. *Front. Plant Sci.* **8**, 37 (2017).
- 757 6. Blackburn, M. R., Haruta, M. & Moura, D. S. Twenty years of progress in physiological  
758 and biochemical investigation of RALF peptides. *Plant Physiol.* **182**, 1657-1666 (2020).
- 759 7. Pearce, G., Moura, D. S., Stratmann, J. & Ryan, C. A. RALF, a 5-kDa ubiquitous  
760 polypeptide in plants, arrests root growth and development. *Proc. Natl Acad. Sci. USA*  
761 **98**, 12843-12847 (2001).
- 762 8. Tavormina, P., De Coninck, B., Nikonorova, N., De Smet, I. & Cammue, B. P. The plant  
763 peptidome: an expanding repertoire of structural features and biological functions. *Plant*  
764 *Cell* **27**, 2095-2118 (2015).
- 765 9. Haruta, M. et al. Molecular characterization of mutant Arabidopsis plants with reduced  
766 plasma membrane proton pump activity. *J. Biol. Chem.* **285**, 17918-17929 (2010).
- 767 10. Covey, P. A. et al. A pollen-specific RALF from tomato that regulates pollen tube  
768 elongation. *Plant Physiol.* **153**, 703-715 (2010).

- 769 11. Shi, F., Zhou, X., Liu, Z. & Feng, H. Rapid alkalization factor (*RALF*) genes are related  
770 to genic male sterility in Chinese cabbage (*Brassica rapa* L. ssp. *pekinensis*). *Sci. Hortic.*  
771 **225**, 480-489 (2017).
- 772 12. Li, D. D., Xue, J. S., Zhu, J. & Yang, Z. N. Gene regulatory network for tapetum  
773 development in *Arabidopsis thaliana*. *Front. Plant Sci.* **8**, 1559 (2017).
- 774 13. Loraine, A. E., McCormick, S., Estrada, A., Patel, K. & Qin, P. RNA-seq of *Arabidopsis*  
775 pollen uncovers novel transcription and alternative splicing. *Plant Physiol.* **162**, 1092-  
776 1109 (2013).
- 777 14. Hung, C. Y. et al. Identification of a Mg-protoporphyrin IX monomethyl ester cyclase  
778 homologue, EaZIP, differentially expressed in variegated *Epipremnum aureum* ‘Golden  
779 Pothos’ is achieved through a unique method of comparative study using tissue  
780 regenerated plants. *J. Exp. Bot.* **61**, 1483-1493 (2010).
- 781 15. Hung, C. Y. et al. Gibberellin deficiency is responsible for shy-flowering nature of  
782 *Epipremnum aureum*. *Sci. Rep.* **6**, 1-11 (2016).
- 783 16. Hung, C. Y. et al. Differential expression of a novel gene *EaF82a* in green and yellow  
784 sectors of variegated *Epipremnum aureum* leaves is related to uneven distribution of  
785 auxin. *Physiol. Plant.* **152**, 749-762 (2014).
- 786 17. Armenteros, J. J. et al. SignalP 5.0 improves signal peptide predictions using deep neural  
787 networks. *Nat. Biotechnol.* **37**, 420-423 (2019).
- 788 18. Marques, J. R., Fonseca, R. R. D., Drury, B. & Melo, A. Amino acid patterns around  
789 disulfide bonds. *Int. J. Mol. Sci.* **11**, 4673-4686 (2010).
- 790 19. Marshall, E., Costa, L. M. & Gutierrez-Marcos, J. Cysteine-rich peptides (CRPs) mediate  
791 diverse aspects of cell–cell communication in plant reproduction and development. *J.*  
792 *Exp. Bot.* **62**, 1677-1686 (2011).
- 793 20. Edgar, R. C. MUSCLE: a multiple sequence alignment method with reduced time and  
794 space complexity. *BMC Bioinform.* **5**, 1-19 (2004).
- 795 21. Kumar, S., Stecher, G., Li, M., Knyaz, C. & Tamura, K. MEGA X: molecular  
796 evolutionary genetics analysis across computing platforms. *Mol. Biol. Evol.* **35**, 1547-  
797 1549 (2018).
- 798 22. Abarca, A., Franck, C. M. & Zipfel, C. Family-wide evaluation of RALF peptides in  
799 *Arabidopsis thaliana*. *Plant Physiol.* **187**, 996-1010 (2021).

- 800 23. De Smet, I. & Jürgens, G. Patterning the axis in plants—auxin in control. *Curr. Opin.*  
801 *Genet. Dev.* **17**, 337-343 (2007).
- 802 24. Yao, X. et al. Auxin production in diploid microsporocytes is necessary and sufficient for  
803 early stages of pollen development. *PLoS Genet.* **14**, e1007397 (2018).
- 804 25. Smyth, D. R., Bowman, J. L. & Meyerowitz, E. M. Early flower development in  
805 *Arabidopsis*. *Plant Cell* **2**, 755-767 (1990).
- 806 26. Sanders, P. M. et al. Anther developmental defects in *Arabidopsis thaliana* male-sterile  
807 mutants. *Sex. Plant Reprod.* **11**, 297-322 (1999).
- 808 27. Mi, H. et al. PANTHER version 16: a revised family classification, tree-based  
809 classification tool, enhancer regions and extensive API. *Nucleic Acids Res.* **49**, D394-  
810 D403 (2021).
- 811 28. Parenicová, L. et al. Molecular and phylogenetic analyses of the complete MADS-box  
812 transcription factor family in *Arabidopsis*: new openings to the MADS world. *Plant Cell*  
813 **15**, 1538-1551 (2003).
- 814 29. Lee, J. & Lee, I. Regulation and function of SOC1, a flowering pathway integrator. *J.*  
815 *Exp. Bot.* **61**, 2247-2254 (2010).
- 816 30. Barnes, W. J. & Anderson, C. T. Release, recycle, rebuild: cell-wall remodeling,  
817 autodegradation, and sugar salvage for new wall biosynthesis during plant development.  
818 *Mol. Plant* **11**, 31-46 (2018).
- 819 31. Pelloux, J., Rusterucci, C. & Mellerowicz, E. J. New insights into pectin methylesterase  
820 structure and function. *Trends Plant Sci.* **12**, 267-277 (2007).
- 821 32. Pina, C., Pinto, F., Feijó, J. A. & Becker, J. D. Gene family analysis of the *Arabidopsis*  
822 pollen transcriptome reveals biological implications for cell growth, division control, and  
823 gene expression regulation. *Plant Physiol.* **138**, 744-756 (2005).
- 824 33. Pinzón-Latorre, D. & Deyholos, M. K. Characterization and transcript profiling of the  
825 pectin methylesterase (PME) and pectin methylesterase inhibitor (PMEI) gene families in  
826 flax (*Linum usitatissimum*). *BMC Genom.* **14**, 742 (2013).
- 827 34. Tian, G. W., Chen, M. H., Zaltsman, A. & Citovsky, V. Pollen-specific pectin  
828 methylesterase involved in pollen tube growth. *Dev. Biol.* **294**, 83-91 (2006).

- 829 35. Phan, H. A., Iacuone, S., Li, S. F. & Parish, R. W. The MYB80 transcription factor is  
830 required for pollen development and the regulation of tapetal programmed cell death in  
831 *Arabidopsis thaliana*. *Plant Cell* **23**, 2209-2224 (2011).
- 832 36. Jia, Q. S. et al. Arabidopsis AT-hook protein TEK positively regulates the expression of  
833 arabinogalactan proteins for Nexine formation. *Mol. Plant* **8**, 251-260 (2015).
- 834 37. Coimbra, S., Costa, M., Jones, B., Mendes, M. A. & Pereira, L. G. Pollen grain  
835 development is compromised in Arabidopsis *agp6 agp11* null mutants. *J. Exp. Bot.* **60**,  
836 3133-3142 (2009).
- 837 38. Goldberg, R. B., Beals, T. P. & Sanders, P. M. Anther development: basic principles and  
838 practical applications. *Plant Cell* **5**, 1217 (1993).
- 839 39. Scott, R. J., Spielman, M. & Dickinson, H. G. Stamen structure and function. *Plant Cell*  
840 **16**, S46-S60 (2004).
- 841 40. Lei, X. & Liu, B. Tapetum-dependent male meiosis progression in plants: Increasing  
842 evidence emerges. *Front. Plant Sci.* **10**, 1667 (2019).
- 843 41. Parish, R. W. & Li, S. F. Death of a tapetum: a programme of developmental altruism.  
844 *Plant Sci.* **178**, 73-89 (2010).
- 845 42. Zhang, D. et al. The cysteine protease CEP1, a key executor involved in tapetal  
846 programmed cell death, regulates pollen development in Arabidopsis. *Plant Cell* **26**,  
847 2939-2961 (2014).
- 848 43. Zhang, D. S. et al. Tapetum degeneration retardation is critical for aliphatic metabolism  
849 and gene regulation during rice pollen development. *Mol. Plant* **1**, 599-610 (2008).
- 850 44. Kawanabe, T., Ariizumi, T., Kawai-Yamada, M., Uchimiya, H. & Toriyama, K.  
851 Abolition of the tapetum suicide program ruins microsporogenesis. *Plant Cell Physiol.*  
852 **47**, 784-787 (2006).
- 853 45. Buono, R. A., Hudecek, R. & Nowack, M. K. Plant proteases during developmental  
854 programmed cell death. *J. Exp. Bot.* **70**, 2097-2112 (2019).
- 855 46. Gallois, J. L. et al. The Arabidopsis proteasome RPT5 subunits are essential for  
856 gametophyte development and show accession-dependent redundancy. *Plant Cell* **21**,  
857 442-459 (2009).
- 858 47. Sun, J. et al. An ATP signalling pathway in plant cells: extracellular ATP triggers  
859 programmed cell death in *Populus euphratica*. *Plant Cell Environ.* **35**, 893-916 (2012).

- 860 48. Van Aken, O. & Van Breusegem, F. Licensed to kill: mitochondria, chloroplasts, and cell  
861 death. *Trends Plant Sci.* **20**, 754-766 (2015).
- 862 49. Marshall, R. S. & Vierstra, R. D. Dynamic regulation of the 26S proteasome: from  
863 synthesis to degradation. *Front. Mol. Biosci.* **6**, 40 (2019).
- 864 50. Brookes, P. S., Yoon, Y., Robotham, J. L., Anders, M. W. & Sheu, S. S. Calcium, ATP,  
865 and ROS: a mitochondrial love-hate triangle. *Am. J. Physiol. Cell Physiol.* **287**, C817-  
866 C833 (2004).
- 867 51. Tanaka, K., Gilroy, S., Jones, A. M. & Stacey, G. Extracellular ATP signaling in plants.  
868 *Trends Cell Biol.* **20**, 601-608 (2010).
- 869 52. Berthomé, R. et al. *pur4* mutations are lethal to the male, but not the female, gametophyte  
870 and affect sporophyte development in *Arabidopsis*. *Plant Physiol.* **147**, 650-660 (2008).
- 871 53. Li, W. Q., Zhang, X. Q., Xia, C., Deng, Y. & Ye, D. MALE GAMETOPHYTE  
872 DEFECTIVE 1, encoding the FAd subunit of mitochondrial F1F0-ATP synthase, is  
873 essential for pollen formation in *Arabidopsis thaliana*. *Plant Cell Physiol.* **51**, 923-935  
874 (2010).
- 875 54. Liang, C. et al. Impacts of high ATP supply from chloroplasts and mitochondria on the  
876 leaf metabolism of *Arabidopsis thaliana*. *Front. Plant Sci.* **6**, 922 (2015).
- 877 55. Kaundal, A. et al. GENERAL CONTROL NONREPRESSIBLE4 degrades 14-3-3 and  
878 the RIN4 complex to regulate stomatal aperture with implications on nonhost disease  
879 resistance and drought tolerance. *Plant Cell* **29**, 2233-2248 (2017).
- 880 56. Phee, B. K. et al. A novel protein phosphatase indirectly regulates phytochrome-  
881 interacting factor 3 via phytochrome. *Biochem. J.* **415**, 247-255 (2008).
- 882 57. Nukarinen, E. et al. Quantitative phosphoproteomics reveals the role of the AMPK plant  
883 ortholog SnRK1 as a metabolic master regulator under energy deprivation. *Sci. Rep.* **6**,  
884 31697 (2016).
- 885 58. Hardie, D. G., Schaffer, B. E. & Brunet, A. AMPK: an energy-sensing pathway with  
886 multiple inputs and outputs. *Trends Cell Biol.* **26**, 190-201 (2016).
- 887 59. Cho, H. Y., Wen, T. N., Wang, Y. T. & Shih, M. C. Quantitative phosphoproteomics of  
888 protein kinase SnRK1 regulated protein phosphorylation in *Arabidopsis* under  
889 submergence. *J. Exp. Bot.* **67**, 2745-2760 (2016).

- 890 60. Tsai, A. Y. L. & Gazzarrini, S. AKIN10 and FUSCA3 interact to control lateral organ  
891 development and phase transitions in Arabidopsis. *Plant J.* **69**, 809-821 (2012).
- 892 61. Jeong, E. Y., Seo, P. J., Woo, J. C. & Park, C. M. AKIN10 delays flowering by  
893 inactivating IDD8 transcription factor through protein phosphorylation in Arabidopsis.  
894 *BMC Plant Bio.* **15**, 1-3 (2015).
- 895 62. Farrás, R. et al. SKP1–SnRK protein kinase interactions mediate proteasomal binding of  
896 a plant SCF ubiquitin ligase. *EMBO J.* **20**, 2742-56 (2001).
- 897 63. Broeckx, T., Hulsmans, S. & Rolland, F. The plant energy sensor: evolutionary  
898 conservation and divergence of SnRK1 structure, regulation, and function. *J. Exp. Bot.*  
899 **67**, 6215-6252 (2016).
- 900 64. Atkinson, N. J., Lilley, C. J. & Urwin, P. E. Identification of genes involved in the  
901 response of Arabidopsis to simultaneous biotic and abiotic stresses. *Plant Physiol.* **162**,  
902 2028-2041 (2013).
- 903 65. Gómez, J. F., Talle, B. & Wilson, Z. A. Anther and pollen development: a conserved  
904 developmental pathway. *J. Integr. Plant Biol.* **57**, 876-891 (2015).
- 905 66. Cardarelli, M. & Cecchetti, V. Auxin polar transport in stamen formation and  
906 development: how many actors? *Front. Plant Sci.* **5**, 333 (2014).
- 907 67. Bitrián, M., Roodbarkelari, F., Horváth, M. & Koncz, C. BAC-recombineering for  
908 studying plant gene regulation: developmental control and cellular localization of SnRK1  
909 kinase subunits. *Plant J.* **65**, 829-842 (2011).
- 910 68. Williams, S. P., Rangarajan, P., Donahue, J. L., Hess, J. E. & Gillaspay, G. E. Regulation  
911 of sucrose non-fermenting related kinase 1 genes in *Arabidopsis thaliana*. *Front. Plant*  
912 *Sci.* **5**, 324 (2014).
- 913 69. Ramon, M. et al. Default activation and nuclear translocation of the plant cellular energy  
914 sensor SnRK1 regulate metabolic stress responses and development. *Plant Cell* **31**, 1614-  
915 1632 (2019).
- 916 70. Emptage, R. P., Lemmon, M. A. & Ferguson, K. M. Molecular determinants of KA1  
917 domain-mediated autoinhibition and phospholipid activation of MARK1 kinase.  
918 *Biochem. J.* **474**, 385-398 (2017).

- 919 71. Musa, T. A., Hung, C. Y., Darlington, D. E., Sane, D. C. & Xie, J. Overexpression of  
920 human erythropoietin in tobacco does not affect plant fertility or morphology. *Plant*  
921 *Biotechnol. Rep.* **3**, 157-165 (2009).
- 922 72. Trapnell, C. et al. Differential gene and transcript expression analysis of RNA-seq  
923 experiments with TopHat and Cufflinks. *Nat. Protoc.* **7**, 562-578 (2012).
- 924 73. Kim, D. et al. TopHat2: accurate alignment of transcriptomes in the presence of  
925 insertions, deletions and gene fusions. *Genome Biol.* **14**, R36 (2013).
- 926 74. Chang, M. & Huang, S. Arabidopsis ACT 11 modifies actin turnover to promote pollen  
927 germination and maintain the normal rate of tube growth. *Plant J.* **83**, 515-527 (2015).
- 928 75. Krishnakumar, S. & Oppenheimer, D. G. Extragenic suppressors of the Arabidopsis zwi-  
929 3 mutation identify new genes that function in trichome branch formation and pollen tube  
930 growth. *Development* **126**, 3079-3088 (1999).
- 931 76. Napolitano, M. J. & Shain, D. H. Distinctions in adenylate metabolism among organisms  
932 inhabiting temperature extremes. *Extremophiles* **9**, 93-98 (2005).
- 933 77. Vallentine, P., Hung, C. Y., Xie, J. & Van Hoewyk, D. The ubiquitin–proteasome  
934 pathway protects *Chlamydomonas reinhardtii* against selenite toxicity, but is impaired as  
935 reactive oxygen species accumulate. *AoB Plants* **6**, plu062 (2014).
- 936 78. Vojtek, A. & Hollenberg, S. M. Ras-Raf interaction: two-hybrid analysis. *Methods*  
937 *Enzymol.* **255**, 331-342 (1995).
- 938 79. Bartel, P. L., Chein, C. T., Sternglanz, R. & Fields, S. in Cellular interactions in  
939 development: A practical approach. ed. Hartley, D.A. (Oxford University Press, Oxford)  
940 pp. 153-179 (1993).
- 941 80. Fromont-Racine M, Rain JC, Legrain P. 1997. Toward a functional analysis of the yeast  
942 genome through exhaustive two-hybrid screens. *Nat. Genet.* **16**, 277-282.
- 943 81. Formstecher, E. et al. Protein interaction mapping: a Drosophila case study. *Genome Res.*  
944 **15**, 376-384 (2005).
- 945 82. Rain, J. C. et al. The protein–protein interaction map of Helicobacter pylori. *Nature* **409**,  
946 211-215 (2001).
- 947 83. Wojcik, J., Boneca, I. G. & Legrain, P. Prediction, assessment and validation of protein  
948 interaction maps in bacteria. *J. Mol. Biol.* **323**, 763-770 (2002).

949 84. Colland, F. et al. 2004. Functional proteomics mapping of a human signaling pathway.  
950 *Genome Res* **14**, 1324-32 (2004).

951 85. Gasteiger, E. et al. Protein identification and analysis tools on the ExPASy server. In *The*  
952 *proteomics protocols handbook* pp. 571-607. (Humana press, 2005).

953

## 954 **Acknowledgements**

955 We thank Qingping He and Maotao He for their assistance on histological analysis, Eva  
956 Johannes for the help on confocal microscopy, and Mythili Saravanan for the help on statistical  
957 analysis.

958

## 959 **Authors' contributions**

960 C.Y.H. and J.X. conceived and designed the experiments. C.Y.H., K.N.W., M.L.U., J.C., D.B.B.,  
961 M.T., Q.Q., and J.Z. performed the experiments. C.Y.H., F.S.K., C.E.O., J.C., K.O.B. and J.X.  
962 analyzed the data. C.Y.H., F.S.K., and J.X. wrote the article with contributions of all the authors.

963

## 964 **Funding**

965 This study was supported by the National Science Foundation grant (HRD-1400946 to J.X. and  
966 C.E.O.), National Institute of General Medical Sciences grant (SC1GM111178 to J. X.) and a  
967 Startup Fund of Golden LEAF Foundation to BRITE.

968

## 969 **Competing interest statement**

970 The authors declare no competing financial interests.

971

## 972 **Materials & Correspondence**

973 Correspondence and requests for materials should be addressed to Jiahua Xie.

974

## 975 **Additional information**

### 976 **1. Supplementary Table 1, 5-9**

977 Table S1. The summary of read counts of RNAseq analysis in current study.

978 Table S5. A subset of FPKM related to tapetum genes.

979 Table S6. The EaF82 interacting proteins.



980 Table S7. The Hybrigenics' references of seven selected clones for 1-by-1 assays.

981 Table S8. Summary of interaction matrix and results.

982 Table S9. List of primer sequences used in current study.

983

## 984 **2. Supplementary Figures 1-11**

985 Fig. S1 Alkalinization assays of inactive EaF82-S as well as a representative of collected pollen  
986 grains and tobacco suspension cells.

987 Fig. S2. Genetic cassettes used in this study.

988 Fig. S3. Tissue specific expression of *EaF82* promoter in Arabidopsis transgenic  
989 *EaF82p::EaF82-sGFP* (TA) lines.

990 Fig. S4. Arabidopsis transgenic *EaF82p::EaF82-sGFP* lines (TA-1, -3, -4, and -5).

991 Fig. S5. Arabidopsis transgenic *35Sp::EaF82-sGFP* (TB) lines.

992 Fig. S6. RT-qPCR of *GUS* expression levels.

993 Fig. S7. Male gametophyte development of Arabidopsis transgenic *35Sp::EaF82-sGFP* (TB)  
994 line.

995 Fig. S8. The numbers of seeds per silique with different length (cm) in Arabidopsis transgenic  
996 *35Sp::EaF82* (TC) line.

997 Fig. S9. RNAseq analysis of early developmental flower buds of two independent *35Sp::EaF82*  
998 (TC1 and TC2) and vector control (C) transgenic lines.

999 Fig. S10. Solid growth tests on +/- Histidine and +/- 3-AT plates.

1000 Fig. S11. A "DomSight" of AKIN10 (AT3G01090) displays the information of bait and prey  
1001 structural, functional and interaction domains.

1002

## 1003 **Supplementary Tables 2-4 in Excel spreadsheets**

1004 Table S2. Common DEGs that both TC-1 and TC-2 increase two-fold compared to the vector  
1005 control.

1006 Table S3. Common DEGs that both TC-1 and TC-2 decrease two-fold compared to the vector  
1007 control.

1008 Table S4. A subset of upregulated and downregulated DEGs with FDR<0.05.

1009

## 1010 **Supplementary Data Sets 1-3 in Excel spreadsheets**

1011 Data Set S1. The FPKM values for normalized read counts of RNAseq analysis of Arabidopsis  
1012 transgenic *35Sp::EaF82* (TC) and vector control (C) lines.

1013 Data Set S2. Gene Ontology enrichment analysis of upregulated DEGs.

1014 Data Set S3. Gene Ontology enrichment analysis of downregulated DEGs.

1015  
1016  
1017  
1018  
1019  
1020  
1021  
1022  
1023  
1024  
1025  
1026  
1027  
1028  
1029  
1030  
1031  
1032  
1033  
1034  
1035  
1036  
1037  
1038  
1039  
1040  
1041  
1042  
1043  
1044  
1045  
1046  
1047  
1048  
1049  
1050  
1051  
1052  
1053  
1054

1055 Table 1. RT-qPCR of a subset of selected DEGs

| Gene ID <sup>a</sup>                                   | Gene description <sup>b</sup>                                                      | TC-1 (n=3)  |                   | TC-2 (n=3)  |                   |
|--------------------------------------------------------|------------------------------------------------------------------------------------|-------------|-------------------|-------------|-------------------|
|                                                        |                                                                                    | RNAseq (FC) | RT-qPCR (FC ± SD) | RNAseq (FC) | RT-qPCR (FC ± SD) |
| <b><i>Flowering and pollen development related</i></b> |                                                                                    |             |                   |             |                   |
| AT2G45660                                              | <b><i>SOCI/AGL20</i></b> (AGAMOUS-like)                                            | 2.52        | 2.15±0.27         | 2.55        | 2.57±0.13         |
| AT4G24540                                              | <b><i>AGL24</i></b> (AGAMOUS-like)                                                 | 3.02        | 2.96±0.35         | 3.27        | 3.80±0.86         |
| AT5G62165                                              | <b><i>AGL42</i></b> (AGAMOUS-like)                                                 | 2.10        | 2.13±0.05         | 2.10        | 2.35±0.18         |
| AT4G35900                                              | <b><i>FD</i></b> (Basic-leucine zipper transcription factor)                       | 3.26        | 1.80±0.16         | 3.84        | 2.24±0.07         |
| AT1G19890                                              | <b><i>MGH3</i></b> (male-gamete-specific histone H3)                               | -2.93       | -4.34±1.32        | -4.91       | -4.34±1.65        |
| AT1G19960                                              | transcription factor                                                               | -5.10       | -6.60±0.87        | -7.50       | -8.55±2.86        |
| AT1G21000                                              | PLATZ family transcription factor                                                  | -4.16       | -4.13±1.52        | -4.42       | -3.86±1.08        |
| AT1G35490                                              | bZIP family transcription factor                                                   | -5.35       | -7.04±3.20        | -7.11       | -7.31±2.50        |
| AT2G36080                                              | <b><i>ABS2/NGALI</i></b> (AP2/B3-like transcription factor)                        | -4.40       | -5.75±1.67        | -4.58       | -5.69±1.69        |
| AT1G24520                                              | <b><i>BCP1</i></b> ( <i>Brassica campestris</i> homolog pollen protein 1)          | -6.65       | -3.15±1.65        | -14.91      | -98.37±5.98       |
| AT5G17480                                              | <b><i>PCI/APCI/CML29</i></b> (pollen calcium-binding protein 1)                    | -2.44       | -4.17±1.85        | -2.66       | -3.99±0.64        |
| AT4G10603                                              | <b><i>SLRI-BP</i></b> (S locus-related glycoprotein 1 binding pollen coat protein) | -2.29       | -3.15±0.55        | -2.64       | -2.57±0.57        |
| AT1G29140                                              | Pollen Ole e 1 allergen and extensin family protein                                | -3.75       | -5.85±1.94        | -4.76       | -6.05±3.63        |
| AT5G45880                                              | Pollen Ole e 1 allergen and extensin family protein                                | -4.09       | -6.26±2.00        | -6.70       | -5.81±0.82        |
| <b><i>H<sup>+</sup>-ATPase</i></b>                     |                                                                                    |             |                   |             |                   |
| AT5G57350                                              | <b><i>HA3</i></b>                                                                  | -2.12       | -2.83±0.74        | -2.28       | -2.16±0.46        |
| AT2G07560                                              | <b><i>HA6</i></b>                                                                  | -2.95       | -4.31±1.35        | -3.48       | -3.87±1.00        |
| AT3G42640                                              | <b><i>HA8</i></b>                                                                  | -2.19       | -2.50±0.95        | -2.74       | -2.54±1.49        |
| AT1G80660                                              | <b><i>HA9</i></b>                                                                  | -3.84       | -4.92±1.00        | -4.52       | -5.08±1.54        |
| AT3G08560                                              | <b><i>VHA-E2</i></b>                                                               | -2.50       | -3.41±0.21        | -2.90       | -2.94±1.14        |
| AT4G25950                                              | <b><i>VATG</i></b>                                                                 | -2.45       | N.A.              | -2.95       | N.A.              |
| <b><i>Protein kinases</i></b>                          |                                                                                    |             |                   |             |                   |
| AT2G07040                                              | <b><i>PRK2A</i></b> (Leucine-rich repeat protein kinase)                           | -5.07       | -8.55±4.81        | -7.81       | -8.47±3.81        |
| AT2G18470                                              | <b><i>PERK4</i></b> (Proline-rich protein kinase)                                  | -3.24       | -4.52±1.24        | -4.07       | -4.18±0.51        |
| AT2G21480                                              | <b><i>BUPS2</i></b> (Malectin/receptor-like)                                       | -3.96       | -6.52±4.87        | -5.45       | -7.75±2.38        |
| AT4G39110                                              | <b><i>BUPS1</i></b> (Malectin/receptor-like)                                       | -3.14       | -1.99±0.49        | -4.65       | -2.10±0.84        |
| AT5G28680                                              | <b><i>ANX2</i></b> (Malectin/receptor-like)                                        | -5.86       | -8.16±6.36        | -12.79      | -25.23±13.51      |

1056 <sup>a</sup>: All DEGs selected have FDR<0.05 and fold changes (FC) great than two-fold; <sup>b</sup>: Gene names  
1057 are italicized and bolded. N.A.: not analyzed.

1058  
1059  
1060  
1061  
1062  
1063

1064 Table 2. RT-qPCR of seven RALF genes and their predicted pI and molecular weight (MW)

| Gene_ID <sup>a</sup> | Gene description (clade) <sup>b</sup> | TC-1 (n=3)  |                   | TC-2 (n=3)  |                   | Predicted pI and MW <sup>c</sup> |         |
|----------------------|---------------------------------------|-------------|-------------------|-------------|-------------------|----------------------------------|---------|
|                      |                                       | RNAseq (FC) | RT-qPCR (FC ± SD) | RNAseq (FC) | RT-qPCR (FC ± SD) | pI                               | MW (kD) |
| AT1G28270            | <b><i>RALF4</i></b> (III-B)           | -4.27       | -7.00±2.79        | -5.96       | -8.37±4.59        | 9.76                             | 8.7     |
| AT1G61563            | <b><i>RALF8</i></b> (IV-C)            | -3.67       | -5.26±1.60        | -5.35       | -5.66±1.00        | 9.30                             | 6.6     |
| AT1G61566            | <b><i>RALF9</i></b> (IV-C)            | -3.51       | -4.77±1.26        | -5.27       | -5.74±1.38        | 9.27                             | 6.6     |
| AT2G22055            | <b><i>RALF15</i></b> (IV-C)           | -5.73       | -2.48±0.39        | -23.41      | -16.92±2.40       | 9.76                             | 6.5     |
| AT2G33775            | <b><i>RALF19</i></b> (III-B)          | -5.26       | -9.10±5.00        | -9.69       | -8.14±3.43        | 10.57                            | 7.5     |
| AT3G25165            | <b><i>RALF25</i></b> (IV-B)           | -8.24       | -2.48±0.67        | -23.55      | -82.52±18.38      | 10.08                            | 7.0     |
| AT4G14020            | RALF family protein (IV-A)            | -3.39       | -4.29±1.30        | -3.78       | -4.02±1.27        | 10.17                            | 6.8     |

1065 <sup>a</sup>: All DEGs selected have FDR<0.05 and fold changes (FC) great than two-fold; <sup>b</sup>: Gene names  
 1066 are italicized and bolded; <sup>c</sup>: Amino acid sequences were retrieved from TAIR  
 1067 (<https://www.arabidopsis.org/>). N.A.: not analyzed.  
 1068  
 1069

## 1070 Figure legends

1071 **Fig. 1** EaF82 peptide and alkalization assay. **a** Amino acid sequence. The predicted signal  
 1072 peptide is highlighted in gray. Four cysteines (C) are marked in red with predicted potential  
 1073 intramolecular disulfide bridges indicated with blue brackets. Sequences for making antibody is  
 1074 underlined. **b** Alkalinization assays of EaF82-S (EaF82 without signal peptide). Six different  
 1075 concentrations (0, 1, 5, 10, 50, and 100 nM) were tested and the pH changes ( $\Delta$  pH) were  
 1076 measured after 10, 20 and 30 min. Data plotted were the average of five independent  
 1077 experiments  $\pm$  SD. The Km and Vmax are listed below. Data marked with the same letter are not  
 1078 significantly different by the LSD test at 5% level of significance. **c** Alkalinization activity  
 1079 measured for 60 min. Data represent the average of five independent experiments  $\pm$  SD. **d**  
 1080 Phylogenetic tree of EaF82 among 795 RALFs from 51 plant species. Clade I, II, III and IV as  
 1081 well as their subgroups are categorized following Campbell and Turner<sup>5</sup>. **e** Phylogenetic tree of  
 1082 EaF82 with clade IV-C of AtRALFs.  
 1083

1084 **Fig. 2** The functional characterization of Arabidopsis transgenic lines carrying EaF82 promoter  
 1085 driving *EaF82-sGFP* (TA) or *GUS*. **a** The newly opened flower (left) shows GFP signal in  
 1086 anthers (right). A: anther. **b** Confocal microscopy shows GFP (left) and DIC (differential  
 1087 interference contrast, right) in stamen (S) and some pollen grains (PG). Bar = 100  $\mu$ m. **c** GUS  
 1088 staining of the flowers of *EaF82p::GUS*. White arrow indicates GUS activity at the early

1089 developmental stages of flowers. Bar = 1.5 mm. **(d)** Immunoblot of pollen proteins against anti-  
1090 EaF82 and anti-GFP. Stained blots show protein loading. TA-1, -3, -4 and -5: four independent  
1091 lines. TB-2: Proteins isolated from flowers of Arabidopsis transgenic *35Sp::EaF82-sGFP*. B:  
1092 blank. C: vector control. WT: wild-type. M: protein size marker. **e** Confocal microscopy  
1093 detecting GFP in pollen of Arabidopsis transgenic *EaF82p::EaF82-sGFP* (TA). Wild-type (WT)  
1094 is a negative control. Bar = 100  $\mu$ m. **f** A 10-week old TA plant (right) bears aborted siliques in  
1095 primary inflorescence stalk (yellow bracket) compared to normal WT (left). Bar = 1 cm. **g** Pollen  
1096 from fully opened flowers stained with iodine-potassium iodide. **h** Germinated pollen under  
1097 germination medium. Bar = 100  $\mu$ m.

1098

1099 **Fig. 3** Male gametophyte and pollen development of Arabidopsis transgenic *35Sp::EaF82-sGFP*  
1100 lines (TB) comparing to wild-type (WT). **a** Fully opened flower (left) and stained anther with  
1101 iodine-potassium iodide (right) of WT and TB line, respectively. Bar = 100  $\mu$ m. **b** TB plants  
1102 (right) produce no siliques with occasionally observed small silique (white arrow) compared to  
1103 WT (left). Bar = 1 cm. **c** TB silique carries less seeds than that of WT (left). The numbers of  
1104 seeds per silique are plotted as the mean  $\pm$  SD (right). n: numbers of siliques. **d** Male  
1105 gametophyte development of TB line compared to WT. At the stage S11, the undegenerated  
1106 tapetum (red arrow) was observed in TB line. At the stages S11 and S12, underdeveloped pollen  
1107 was stained in light green, while mature pollen is in dark blue that occasionally was observed in  
1108 TB line (black arrow). Bar = 50  $\mu$ m.

1109

1110 **Fig. 4** The functional characterization of tobacco transgenic *35Sp::EaF82* lines (T2, 3, 8 and 11)  
1111 comparing to two independent vector control lines (C1 and C2). **a** Immunoblot of leaf proteins  
1112 against anti-EaF82. Stained blot shows protein loading. **b** T8 (right) and C1 (left) opened  
1113 flowers. **c** Immunoblot of unopened flower proteins against anti-EaF82. The unopened flowers  
1114 are as indicated in (d) with orange star. **d** Transgenic plants with normal (red arrow) and aborted  
1115 (white arrow) seed pods. Enlarged seed pods are shown below. **e** Seed counts per pod. Data  
1116 plotted are the average from six independent plants per line using 10 seed pods per independent  
1117 plant  $\pm$  SD. Data marked with the same letter are not significantly different by the LSD test at  
1118 5% level of significance. Bar = 200  $\mu$ m.

1119

1120 **Fig. 5** The functional characterization and RNAseq analysis of Arabidopsis transgenic  
1121 *35Sp::EaF82* lines (TC-1 and -2) compared to wild-type (WT) and vector control (C). **a** RT-PCR  
1122 of leaf tissues using primer pair specific to *EaF82* and *18S rRNA*. +: plasmid DNA. **b**  
1123 Immunoblot of leaf proteins against anti-EaF82. Stained blot shows protein loading. M: protein  
1124 size marker. **c** Normal growth of TC and WT plants. **d** Aborted siliques in TC-1 and TC-2. **e**  
1125 Immunoblot of proteins from unopened whole flowers against anti-EaF82. **f** Stained pollen and **g**  
1126 germinated pollen. The descriptions are the same as in Fig. 2. Bar=100  $\mu$ m. **h** Histogram of the  
1127 silique lengths. Data plotted are the percentages of total siliques. n: numbers of siliques. **i** The  
1128 number of up- and down-regulated DEGs ( $\geq 2$ -fold) in TC-1 and -2 lines. **j** Enriched GO terms  
1129 from down-regulated DEGs related to pH regulation and cell wall modification.

1130  
1131 **Fig. 6** Immunoblots of three subunits of the proteasome, proteasome activity and ATP content in  
1132 early developmental flowers of TC lines. **a** Anti-Rpn6, anti-Rpn10 and anti-Rpt5a showed no  
1133 significant difference among all samples. **b** Proteasome activity. Data plotted are the average of  
1134 three biological replicates  $\pm$  SD. RFU: relative fluorescence units. **c** ATP content. Data plotted  
1135 are the average of four biological replicates  $\pm$  SD. FW: fresh weight.

1136  
1137 **Fig. 7** Identification and characterization of an EaF82 interacting partner. **a** Yeast growth tests of  
1138 1-by-1 Y2H assay on selective medium without (DO-2) or with (DO-3) histidine and 3-  
1139 aminotriazole (3AT). Supporting information is detailed in Supplementary Fig. 10. +: positive  
1140 interaction; pB27 $\emptyset$  and pP7 $\emptyset$ : empty vectors. **b** Co-immunoprecipitation (co-IP) analysis to  
1141 validate the Y2H results of EaF82 and AKIN10 interaction. Protein extracts from floral tissues of  
1142 vector control (C) and TC transgenic lines were spiked with (+) or without (-) EaF82-S. The  
1143 complex was pull-downed with (+) or without (-) anti-AKIN10 antibody. The immobilized anti-  
1144 AKIN10 on protein A/G magnetic beads could pull-down EaF82 and AKIN10 complex from  
1145 both C and TC lines (lanes 4 and 7). EaF82 was undetectable without immobilized anti-AKIN10  
1146 antibody (lanes 3 and 6). Lane 1: protein size marker. Lanes 2 and 5: extracted proteins from C  
1147 and TC lines. Lane 8: EaF82-S alone bound to protein A/G magnetic beads. **c** A representative  
1148 immunoblot of proteins from unopened flowers against anti-AKIN10 that detects both AKIN10  
1149 (61 kD) and AKIN11 (58 kD). The average of band intensity is plotted as three independent

1150 experiments  $\pm$  SD (below). Data marked with the same letter are not significantly different by the  
1151 LSD test at 5% level of significance.

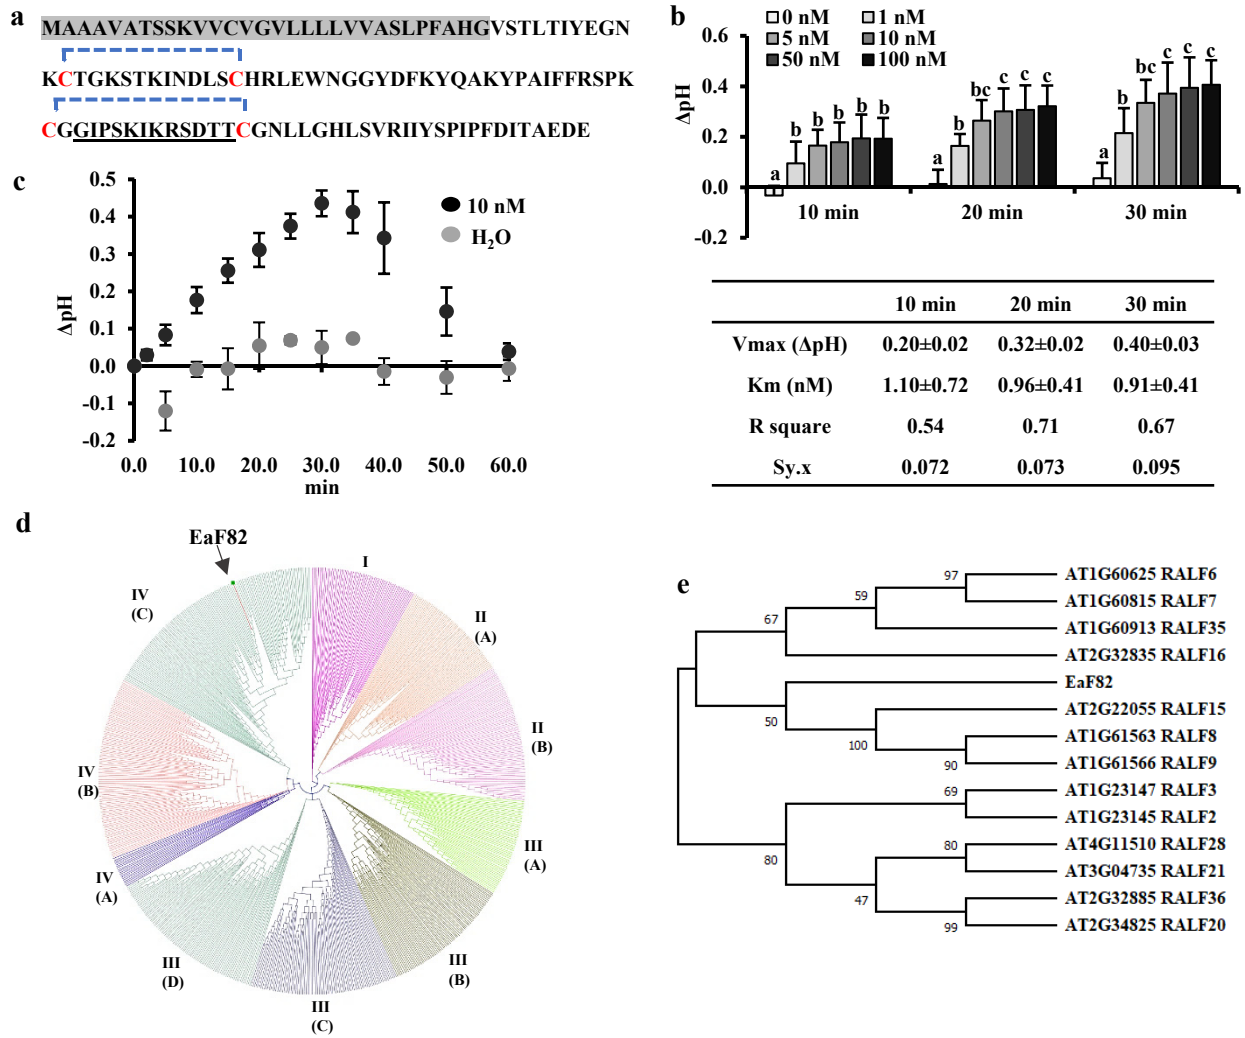

**Fig. 1**



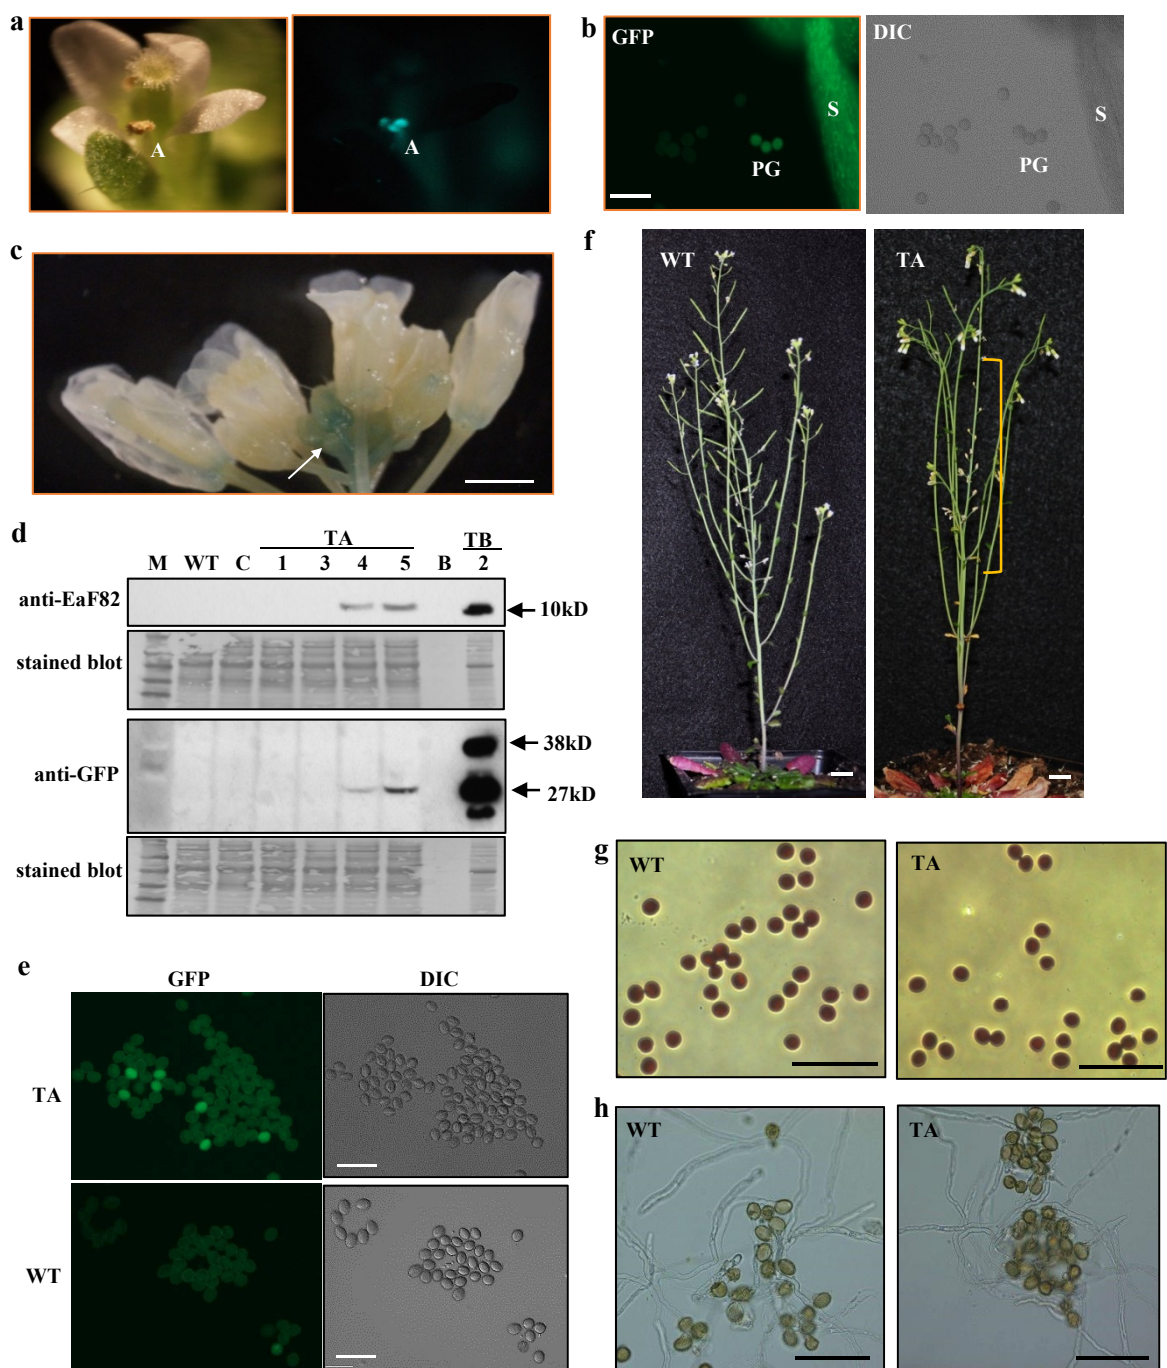

Fig. 2

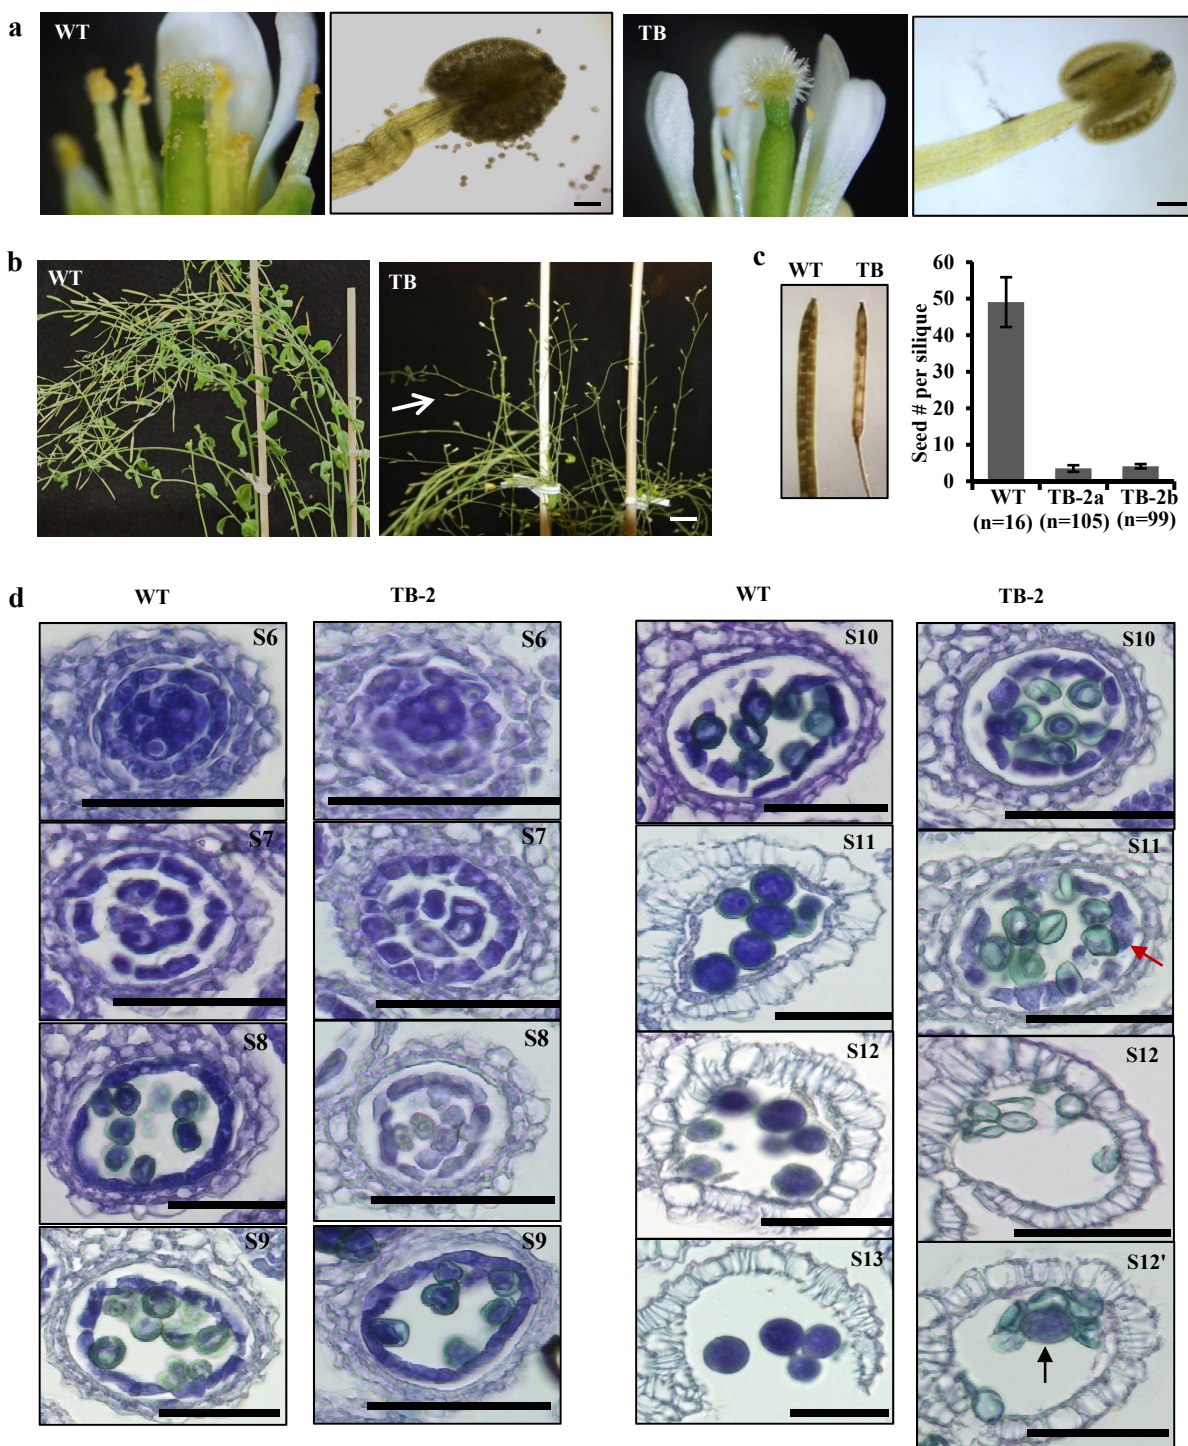

Fig. 3

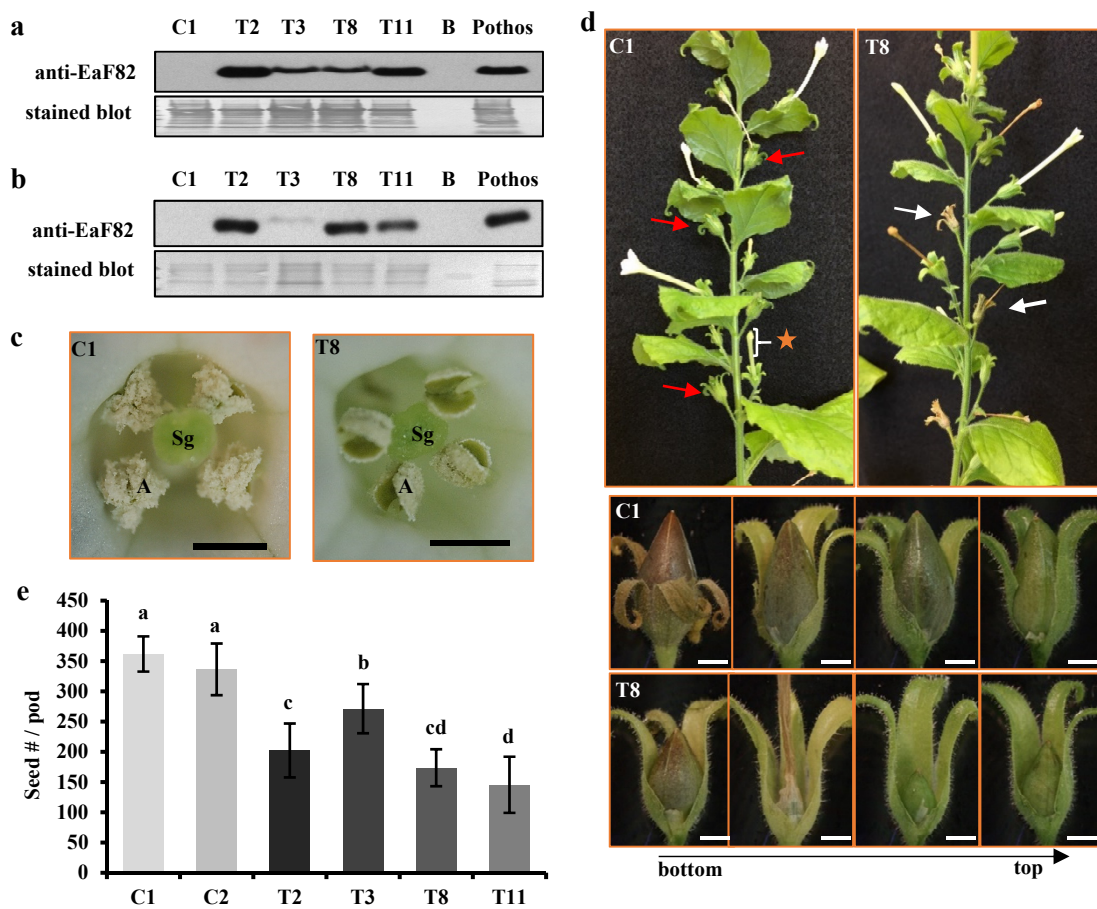

**Fig. 4**

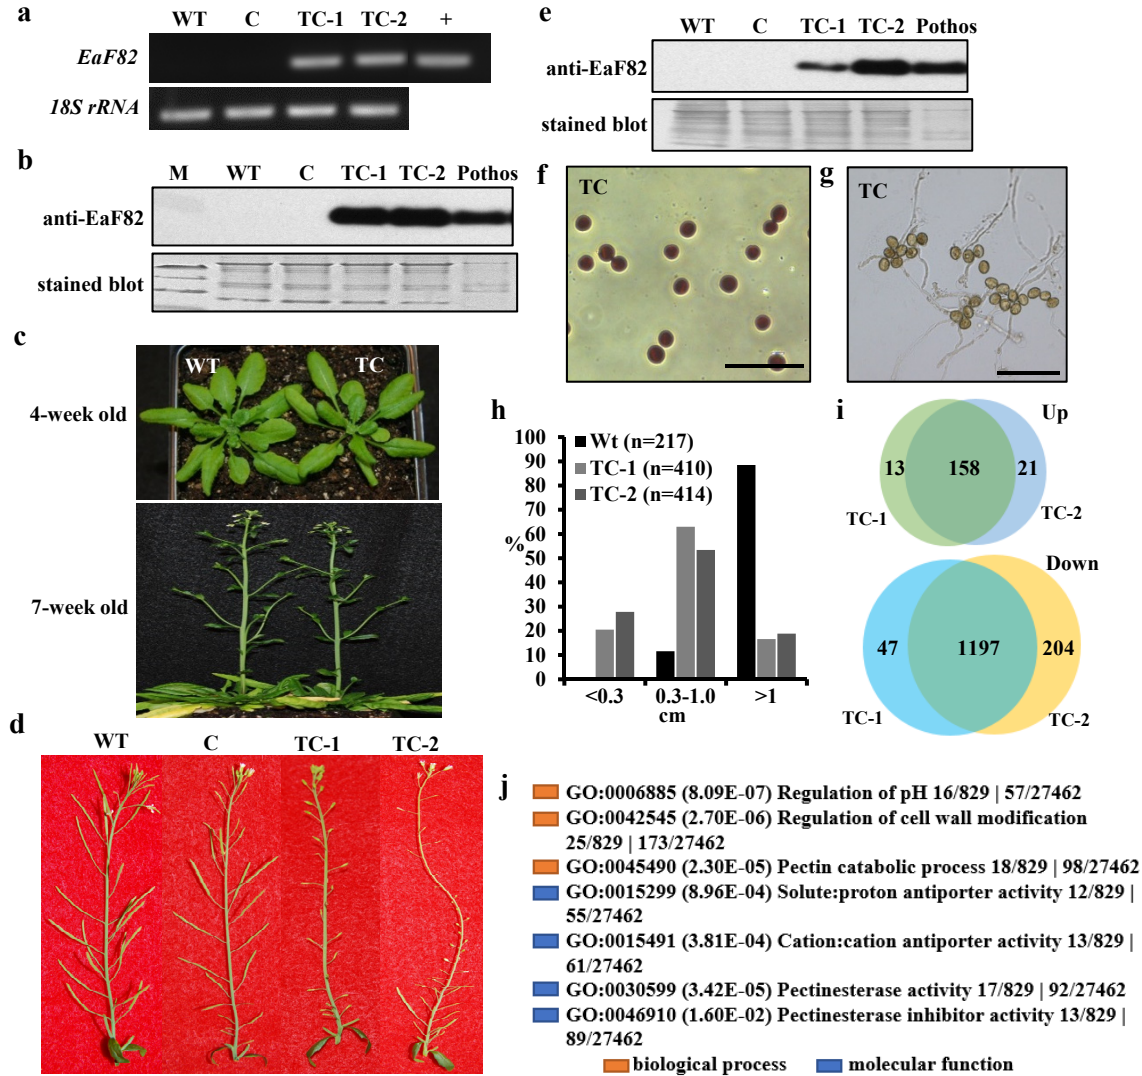

Fig. 5

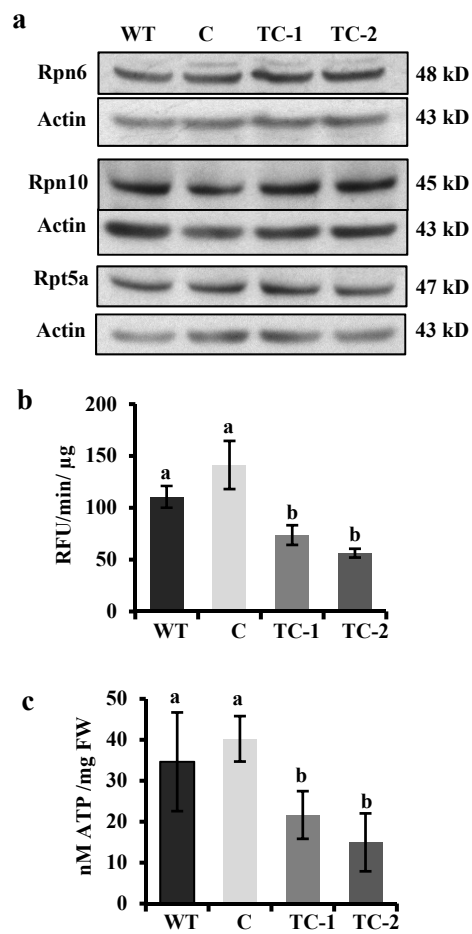

**Fig. 6**

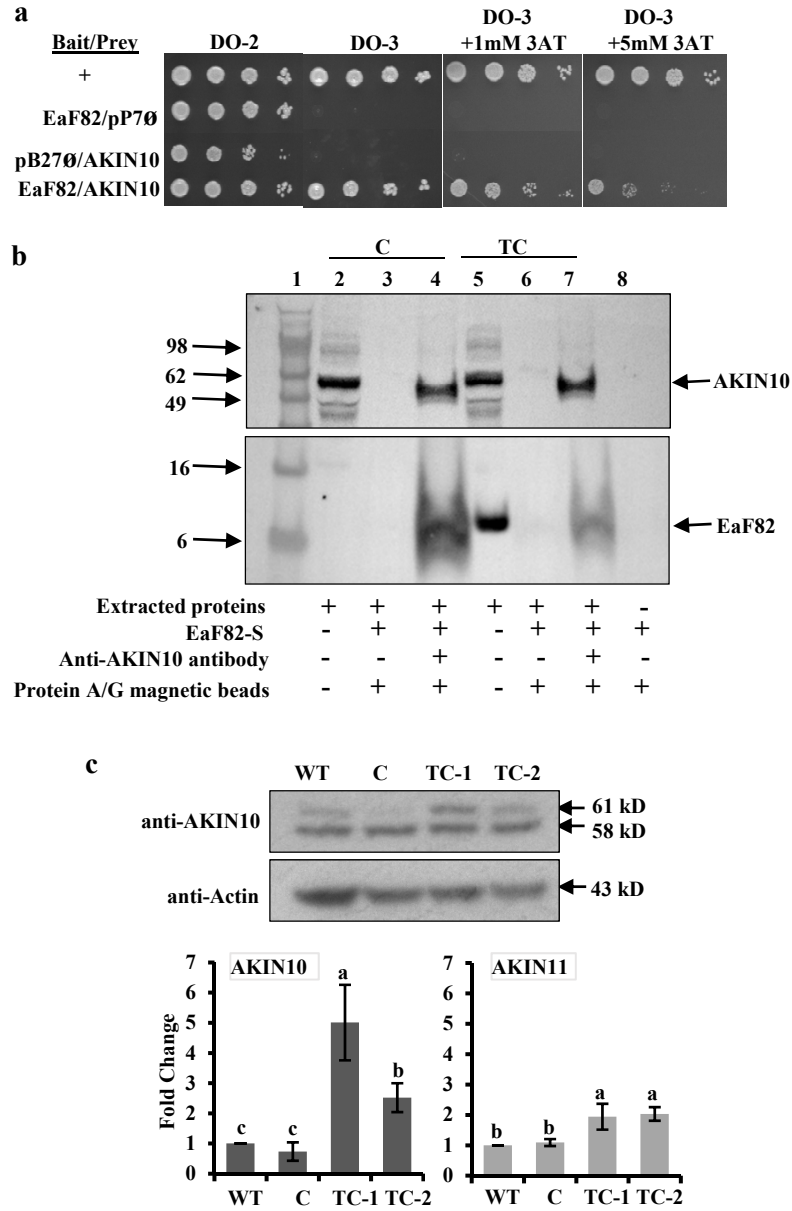

**Fig. 7**
